# Supplementary material for: Long Non-Coding RNA and Alternative Splicing Modulations in Parkinson's Leukocytes Identified by RNA Sequencing
Source: PLoS Comput Biol. 2014 Mar 20;10(3):e1003517. doi: 10.1371/journal.pcbi.1003517 (PMC3961179; doi:10.1371/journal.pcbi.1003517)
Supplement: Table S5 — Enriched miRNA binding sites within alternatively spliced genes in PD detected splicing events. (XLSX) [file pcbi.1003517.s011.xlsx]

## Sheet: S5A
Table S5A
Enrichment of miRNA binding sites in PD leukocyte detected junctions (by linear regression analysis) compared to HC
microRNA-Name	Number Changed	Number Measured	Percent Changed	Zscore	PermuteP	AdjP	Changed GeneSymbols
hsa-miR-874	1	16	6.25	1.25054	0.0055	0.357778	ITFG2
hsa-miR-222	1	20	5	0.993989	0.0055	0.357778	PTPN12
hsa-miR-338-3p	1	28	3.57143	0.6267	0.0055	0.357778	ITFG2
hsa-miR-507	1	8	12.5	2.15714	0.0065	0.357778	GSN
hsa-miR-18a	1	15	6.66667	1.32731	0.0065	0.357778	PTPRC
hsa-miR-18b	1	16	6.25	1.25054	0.0065	0.357778	PTPRC
hsa-miR-451	1	10	10	1.84308	0.007	0.357778	C20orf72
hsa-miR-26b	1	16	6.25	1.25054	0.007	0.357778	C20orf72
hsa-miR-26a	1	19	5.26316	1.05186	0.007	0.357778	C20orf72
hsa-miR-335	1	20	5	0.993989	0.007	0.357778	C20orf72
hsa-miR-365	1	15	6.66667	1.32731	0.0075	0.357778	FRG1B
hsa-miR-361-5p	1	19	5.26316	1.05186	0.0075	0.357778	C18orf8
hsa-miR-133b	1	20	5	0.993989	0.0075	0.357778	FRG1B
hsa-miR-195	1	39	2.5641	0.276898	0.008	0.357778	FCGR2C
hsa-miR-16	1	41	2.43902	0.224302	0.008	0.357778	FCGR2C
hsa-miR-497	1	41	2.43902	0.224302	0.008	0.357778	FCGR2C
hsa-miR-424	1	42	2.38095	0.19893	0.008	0.357778	FCGR2C
hsa-miR-15a	1	45	2.22222	0.126117	0.008	0.357778	FCGR2C
hsa-miR-133a	2	22	9.09091	2.45738	0.014	0.593158	GSN, FRG1B
hsa-miR-150	2	25	8	2.22576	0.0155	0.623875	SMCHD1, PTPN12

## Sheet: S5C
Table S5B
microRNA-Name	Number Changed	Number Measured	Percent Changed	Zscore	PermuteP	AdjP	Changed GeneSymbols
hsa-miR-126	1	173	0.578035	-0.579082	0.0025	0.0235429	DDX11
hsa-miR-31*	1	88	1.13636	0.116963	0.003	0.0235429	CAPN10
hsa-miR-361-3p	1	111	0.900901	-0.11848	0.003	0.0235429	CAPN10
hsa-miR-491-3p	1	121	0.826446	-0.206444	0.003	0.0235429	CAPN10
hsa-miR-137	1	500	0.2	-1.89487	0.003	0.0235429	CAPN10
hsa-miR-544	1	671	0.149031	-2.36978	0.003	0.0235429	CAPN10
hsa-miR-628	1	57	1.75439	0.562155	0.0035	0.0235429	TSC2
hsa-miR-140-5p	1	383	0.261097	-1.51772	0.004	0.0235429	SMAP1
hsa-miR-129	1	125	0.8	-0.239744	0.0045	0.0235429	SON
hsa-miR-455-5p	1	353	0.283286	-1.41029	0.0045	0.0235429	SLC39A8
hsa-miR-365	1	366	0.273224	-1.45751	0.0045	0.0235429	SLC39A8
hsa-miR-362-3p	1	371	0.269542	-1.4754	0.0045	0.0235429	SLC39A8
hsa-miR-454	1	484	0.206612	-1.84647	0.0045	0.0235429	SLC39A8
hsa-miR-542-3p	1	502	0.199203	-1.90087	0.0045	0.0235429	SLC39A8
hsa-miR-135b	1	558	0.179211	-2.06384	0.0045	0.0235429	SLC39A8
hsa-miR-19b	1	573	0.17452	-2.10607	0.0045	0.0235429	MBD2
hsa-miR-19a	1	593	0.168634	-2.16152	0.0045	0.0235429	MBD2
hsa-miR-214*	1	80	1.25	0.213645	0.005	0.0235429	FAHD2B
hsa-miR-148b*	1	89	1.1236	0.105515	0.005	0.0235429	FAHD2B
hsa-miR-30b*	1	103	0.970874	-0.0425085	0.005	0.0235429	ITLN1
hsa-miR-26a-1*	1	108	0.925926	-0.0906263	0.005	0.0235429	ITLN1
hsa-miR-26b*	1	108	0.925926	-0.0906263	0.005	0.0235429	ITLN1
hsa-miR-188-3p	1	109	0.917431	-0.0999922	0.005	0.0235429	ITLN1
hsa-miR-942	1	110	0.909091	-0.109276	0.005	0.0235429	FAHD2B
hsa-miR-23b*	1	119	0.840336	-0.18941	0.005	0.0235429	ITLN1
hsa-miR-125b-1*	1	126	0.793651	-0.247916	0.005	0.0235429	FAHD2B
hsa-miR-23a*	1	126	0.793651	-0.247916	0.005	0.0235429	ITLN1
hsa-miR-188-5p	1	128	0.78125	-0.264082	0.005	0.0235429	FAHD2B
hsa-miR-362-5p	1	131	0.763359	-0.287907	0.005	0.0235429	ITLN1
hsa-miR-450b-3p	1	132	0.757576	-0.295738	0.005	0.0235429	ITLN1
hsa-miR-532-3p	1	134	0.746269	-0.311242	0.005	0.0235429	ITLN1
hsa-miR-532-5p	1	142	0.704225	-0.371258	0.005	0.0235429	FAHD2B
hsa-miR-331-3p	1	143	0.699301	-0.378547	0.005	0.0235429	FAHD2B
hsa-miR-92a-1*	1	148	0.675676	-0.414339	0.005	0.0235429	ITLN1
hsa-miR-501	1	164	0.609756	-0.522246	0.005	0.0235429	FAHD2B
hsa-miR-744	1	167	0.598802	-0.541474	0.005	0.0235429	FAHD2B
hsa-miR-584	1	206	0.485437	-0.768768	0.005	0.0235429	ITLN1
hsa-miR-603	1	218	0.458716	-0.831799	0.005	0.0235429	FAHD2B
hsa-miR-486	1	219	0.456621	-0.83693	0.005	0.0235429	FAHD2B
hsa-miR-220	1	231	0.4329	-0.897164	0.005	0.0235429	FAHD2B
hsa-miR-362	1	232	0.431034	-0.902076	0.005	0.0235429	FAHD2B
hsa-miR-17-3p	1	236	0.423729	-0.92157	0.005	0.0235429	FAHD2B
hsa-miR-550	1	240	0.416667	-0.94082	0.005	0.0235429	FAHD2B
hsa-miR-28	1	249	0.401606	-0.983288	0.005	0.0235429	FAHD2B
hsa-miR-342	1	250	0.4	-0.987937	0.005	0.0235429	FAHD2B
hsa-miR-188	1	253	0.395257	-1.0018	0.005	0.0235429	FAHD2B
hsa-miR-432*	1	266	0.37594	-1.06056	0.005	0.0235429	FAHD2B
hsa-miR-452	1	276	0.362319	-1.10439	0.005	0.0235429	FAHD2B
hsa-miR-621	1	286	0.34965	-1.14713	0.005	0.0235429	FAHD2B
hsa-miR-193a	1	315	0.31746	-1.26555	0.005	0.0235429	FAHD2B
hsa-miR-668	1	342	0.292398	-1.36947	0.005	0.0235429	FAHD2B
hsa-miR-491	1	374	0.26738	-1.48606	0.005	0.0235429	FAHD2B
hsa-miR-662	1	377	0.265252	-1.49666	0.005	0.0235429	FAHD2B
hsa-miR-492	1	385	0.25974	-1.5247	0.005	0.0235429	FAHD2B
hsa-miR-412	1	395	0.253165	-1.55924	0.005	0.0235429	FAHD2B
hsa-miR-631	1	403	0.248139	-1.58651	0.005	0.0235429	FAHD2B
hsa-miR-566	1	421	0.23753	-1.6467	0.005	0.0235429	FAHD2B
hsa-miR-187	1	422	0.236967	-1.65	0.005	0.0235429	FAHD2B
hsa-miR-635	1	429	0.2331	-1.67297	0.005	0.0235429	FAHD2B
hsa-miR-18a*	1	438	0.228311	-1.70218	0.005	0.0235429	FAHD2B
hsa-miR-625	1	441	0.226757	-1.71184	0.005	0.0235429	FAHD2B
hsa-miR-647	1	443	0.225734	-1.71826	0.005	0.0235429	FAHD2B
hsa-miR-565	1	491	0.203666	-1.86775	0.005	0.0235429	FAHD2B
hsa-miR-629	1	498	0.200803	-1.88887	0.005	0.0235429	FAHD2B
hsa-miR-596	1	510	0.196078	-1.92471	0.005	0.0235429	FAHD2B
hsa-miR-675	1	524	0.19084	-1.96596	0.005	0.0235429	FAHD2B
hsa-miR-96	1	545	0.183486	-2.02679	0.005	0.0235429	FAHD2B
hsa-miR-136	1	668	0.149701	-2.36198	0.005	0.0235429	PHACTR4
hsa-miR-193b	1	668	0.149701	-2.36198	0.005	0.0235429	FAHD2B
hsa-miR-346	1	668	0.149701	-2.36198	0.005	0.0235429	FAHD2B
hsa-miR-493*	1	78	1.28205	0.239381	0.0055	0.0235429	TDRKH
hsa-miR-145*	1	95	1.05263	0.0394319	0.0055	0.0235429	COX11
hsa-miR-368	1	96	1.04167	0.028825	0.0055	0.0235429	TDRKH
hsa-miR-624*	1	104	0.961538	-0.0523101	0.0055	0.0235429	TDRKH
hsa-miR-518e*	1	106	0.943396	-0.0716424	0.0055	0.0235429	TDRKH
hsa-miR-323-3p	1	108	0.925926	-0.0906263	0.0055	0.0235429	TDRKH
hsa-miR-200b*	1	109	0.917431	-0.0999922	0.0055	0.0235429	TDRKH
hsa-miR-30a-5p	1	117	0.854701	-0.172108	0.0055	0.0235429	TDRKH
hsa-miR-219-1-3p	1	120	0.833333	-0.19796	0.0055	0.0235429	COX11
hsa-miR-887	1	129	0.775194	-0.27208	0.0055	0.0235429	TDRKH
hsa-miR-30d*	1	131	0.763359	-0.287907	0.0055	0.0235429	TDRKH
hsa-miR-490-5p	1	134	0.746269	-0.311242	0.0055	0.0235429	TDRKH
hsa-miR-30a*	1	136	0.735294	-0.326539	0.0055	0.0235429	TDRKH
hsa-miR-30e*	1	136	0.735294	-0.326539	0.0055	0.0235429	TDRKH
hsa-miR-553	1	136	0.735294	-0.326539	0.0055	0.0235429	TDRKH
hsa-miR-576-3p	1	139	0.719424	-0.349113	0.0055	0.0235429	TDRKH
hsa-miR-342-5p	1	142	0.704225	-0.371258	0.0055	0.0235429	TDRKH
hsa-miR-671-3p	1	162	0.617284	-0.509262	0.0055	0.0235429	TDRKH
hsa-miR-518d-5p	1	169	0.591716	-0.554133	0.0055	0.0235429	TDRKH
hsa-miR-409-3p	1	171	0.584795	-0.566668	0.0055	0.0235429	TDRKH
hsa-miR-885-3p	1	175	0.571429	-0.591377	0.0055	0.0235429	TDRKH
hsa-miR-95	1	175	0.571429	-0.591377	0.0055	0.0235429	TDRKH
hsa-miR-30a-3p	1	183	0.546448	-0.639435	0.0055	0.0235429	TDRKH
hsa-miR-624	1	205	0.487805	-0.763388	0.0055	0.0235429	TDRKH
hsa-miR-189	1	217	0.460829	-0.826649	0.0055	0.0235429	TDRKH
hsa-miR-524	1	227	0.440529	-0.877353	0.0055	0.0235429	TDRKH
hsa-miR-600	1	228	0.438596	-0.88233	0.0055	0.0235429	TDRKH
hsa-miR-518f*	1	231	0.4329	-0.897164	0.0055	0.0235429	TDRKH
hsa-miR-409-5p	1	245	0.408163	-0.964554	0.0055	0.0235429	TDRKH
hsa-miR-450a	1	246	0.406504	-0.969258	0.0055	0.0235429	RPS20
hsa-miR-583	1	261	0.383142	-1.03821	0.0055	0.0235429	TDRKH
hsa-miR-571	1	284	0.352113	-1.13866	0.0055	0.0235429	TDRKH
hsa-miR-453	1	305	0.327869	-1.22558	0.0055	0.0235429	ANKAR
hsa-miR-513	1	308	0.324675	-1.23766	0.0055	0.0235429	TDRKH
hsa-miR-490-3p	1	317	0.315457	-1.27345	0.0055	0.0235429	RPS20
hsa-miR-125a	1	320	0.3125	-1.28522	0.0055	0.0235429	TDRKH
hsa-miR-486-5p	1	327	0.30581	-1.31243	0.0055	0.0235429	COX11
hsa-miR-122	1	337	0.296736	-1.35064	0.0055	0.0235429	ADCY6
hsa-miR-767-5p	1	337	0.296736	-1.35064	0.0055	0.0235429	TDRKH
hsa-miR-125a-5p	1	353	0.283286	-1.41029	0.0055	0.0235429	COX11
hsa-miR-500	1	364	0.274725	-1.45032	0.0055	0.0235429	TDRKH
hsa-miR-542-5p	1	365	0.273973	-1.45392	0.0055	0.0235429	TDRKH
hsa-miR-302e	1	396	0.252525	-1.56267	0.0055	0.0235429	RPS20
hsa-miR-184	1	397	0.251889	-1.56609	0.0055	0.0235429	TDRKH
hsa-miR-139-5p	1	408	0.245098	-1.60338	0.0055	0.0235429	COX11
hsa-miR-21	1	413	0.242131	-1.62014	0.0055	0.0235429	TDRKH
hsa-miR-499-5p	1	418	0.239234	-1.63677	0.0055	0.0235429	TDRKH
hsa-miR-1	1	487	0.205339	-1.85561	0.0055	0.0235429	COX11
hsa-miR-613	1	496	0.201613	-1.88285	0.0055	0.0235429	COX11
hsa-miR-320d	1	503	0.198807	-1.90386	0.0055	0.0235429	COX11
hsa-miR-376c	1	506	0.197628	-1.91281	0.0055	0.0235429	TDRKH
hsa-miR-638	1	507	0.197239	-1.91579	0.0055	0.0235429	TDRKH
hsa-miR-671	1	510	0.196078	-1.92471	0.0055	0.0235429	TDRKH
hsa-miR-320c	1	515	0.194175	-1.93951	0.0055	0.0235429	COX11
hsa-miR-146a	1	542	0.184502	-2.01817	0.0055	0.0235429	COX11
hsa-miR-130a	1	550	0.181818	-2.04109	0.0055	0.0235429	ANKAR
hsa-miR-130b	1	565	0.176991	-2.08362	0.0055	0.0235429	ANKAR
hsa-miR-765	1	580	0.172414	-2.12558	0.0055	0.0235429	TDRKH
hsa-miR-377	1	587	0.170358	-2.14498	0.0055	0.0235429	COX11
hsa-miR-421	1	588	0.170068	-2.14775	0.0055	0.0235429	COX11
hsa-miR-125b	1	601	0.166389	-2.18345	0.0055	0.0235429	COX11
hsa-miR-503	1	618	0.161812	-2.22959	0.0055	0.0235429	TDRKH
hsa-miR-519d	1	641	0.156006	-2.29108	0.0055	0.0235429	RPS20
hsa-miR-372	1	654	0.152905	-2.32538	0.0055	0.0235429	RPS20
hsa-miR-106b	1	676	0.147929	-2.38274	0.0055	0.0235429	RPS20
hsa-miR-203	1	802	0.124688	-2.69705	0.0055	0.0235429	COX11
hsa-miR-590	1	29	3.44828	1.31335	0.006	0.0235429	TPM1
hsa-miR-367*	1	84	1.19048	0.164121	0.006	0.0235429	SIRT5
hsa-miR-132*	1	88	1.13636	0.116963	0.006	0.0235429	RELL1
hsa-miR-148a*	1	94	1.06383	0.0501503	0.006	0.0235429	RELL1
hsa-miR-380*	1	95	1.05263	0.0394319	0.006	0.0235429	RELL1
hsa-miR-25*	1	98	1.02041	0.00793553	0.006	0.0235429	RELL1
hsa-miR-509-5p	1	99	1.0101	-0.00235201	0.006	0.0235429	RELL1
hsa-miR-497*	1	106	0.943396	-0.0716424	0.006	0.0235429	SIRT5
hsa-miR-27b*	1	108	0.925926	-0.0906263	0.006	0.0235429	TPM1
hsa-miR-519c	1	109	0.917431	-0.0999922	0.006	0.0235429	TPM1
hsa-miR-936	1	112	0.892857	-0.127605	0.006	0.0235429	TPM1
hsa-miR-374b*	1	119	0.840336	-0.18941	0.006	0.0235429	RELL1
hsa-miR-548a-3p	1	119	0.840336	-0.18941	0.006	0.0235429	SIRT5
hsa-miR-135b*	1	120	0.833333	-0.19796	0.006	0.0235429	TPM1
hsa-let-7d*	1	121	0.826446	-0.206444	0.006	0.0235429	SIRT5
hsa-miR-891a	1	122	0.819672	-0.214863	0.006	0.0235429	SIRT5
hsa-let-7b*	1	127	0.787402	-0.256028	0.006	0.0235429	SIRT5
hsa-let-7f-2*	1	127	0.787402	-0.256028	0.006	0.0235429	TPM1
hsa-miR-193b*	1	127	0.787402	-0.256028	0.006	0.0235429	RELL1
hsa-miR-519b	1	130	0.769231	-0.280021	0.006	0.0235429	TPM1
hsa-miR-924	1	130	0.769231	-0.280021	0.006	0.0235429	TPM1
hsa-miR-940	1	131	0.763359	-0.287907	0.006	0.0235429	TPM1
hsa-miR-501-3p	1	136	0.735294	-0.326539	0.006	0.0235429	RELL1
hsa-miR-556-3p	1	136	0.735294	-0.326539	0.006	0.0235429	SIRT5
hsa-miR-674	1	137	0.729927	-0.334113	0.006	0.0235429	TPM1
hsa-miR-208a	1	138	0.724638	-0.341637	0.006	0.0235429	SIRT5
hsa-miR-502-3p	1	138	0.724638	-0.341637	0.006	0.0235429	RELL1
hsa-let-7a*	1	140	0.714286	-0.356541	0.006	0.0235429	SIRT5
hsa-miR-30c-2*	1	143	0.699301	-0.378547	0.006	0.0235429	TPM1
hsa-miR-548d-3p	1	143	0.699301	-0.378547	0.006	0.0235429	SIRT5
hsa-miR-516b	1	153	0.653595	-0.449092	0.006	0.0235429	RELL1
hsa-let-7g*	1	161	0.621118	-0.502719	0.006	0.0235429	TPM1
hsa-miR-519c-3p	1	163	0.613497	-0.51577	0.006	0.0235429	TPM1
hsa-miR-620	1	163	0.613497	-0.51577	0.006	0.0235429	RELL1
hsa-miR-886-3p	1	165	0.606061	-0.528688	0.006	0.0235429	RELL1
hsa-miR-586	1	168	0.595238	-0.54782	0.006	0.0235429	RELL1
hsa-miR-299-5p	1	179	0.558659	-0.615626	0.006	0.0235429	RELL1
hsa-miR-549	1	189	0.529101	-0.674371	0.006	0.0235429	TPM1
hsa-miR-563	1	196	0.510204	-0.714022	0.006	0.0235429	RELL1
hsa-miR-615-3p	1	208	0.480769	-0.779466	0.006	0.0235429	AACS
hsa-miR-199b	1	223	0.44843	-0.857279	0.006	0.0235429	TPM1
hsa-miR-573	1	242	0.413223	-0.950357	0.006	0.0235429	TPM1
hsa-miR-595	1	260	0.384615	-1.03371	0.006	0.0235429	TPM1
hsa-miR-589	1	310	0.322581	-1.24567	0.006	0.0235429	TPM1
hsa-miR-617	1	311	0.321543	-1.24967	0.006	0.0235429	TPM1
hsa-miR-632	1	347	0.288184	-1.38813	0.006	0.0235429	TPM1
hsa-miR-411	1	355	0.28169	-1.41763	0.006	0.0235429	TPM1
hsa-miR-648	1	360	0.277778	-1.43585	0.006	0.0235429	TPM1
hsa-miR-622	1	397	0.251889	-1.56609	0.006	0.0235429	TPM1
hsa-miR-320	1	420	0.238095	-1.64339	0.006	0.0235429	TPM1
hsa-miR-199a-5p	1	475	0.210526	-1.81886	0.006	0.0235429	TPM1
hsa-miR-199b-5p	1	492	0.203252	-1.87078	0.006	0.0235429	TPM1
hsa-miR-128	1	499	0.200401	-1.89187	0.006	0.0235429	TPM1
hsa-miR-134	1	582	0.171821	-2.13114	0.006	0.0235429	TPM1
hsa-miR-143	1	600	0.166667	-2.18072	0.006	0.0235429	SIRT5
hsa-miR-148a	1	608	0.164474	-2.20253	0.006	0.0235429	RELL1
hsa-miR-937	1	143	0.699301	-0.378547	0.0065	0.0235429	MAP7D3
hsa-miR-875-3p	1	150	0.666667	-0.42836	0.0065	0.0235429	MAP7D3
hsa-miR-520a-5p	1	166	0.60241	-0.535097	0.0065	0.0235429	CCDC15
hsa-miR-100	1	225	0.444444	-0.86735	0.0065	0.0235429	CARM1
hsa-miR-339-5p	1	355	0.28169	-1.41763	0.0065	0.0235429	MAP7D3
hsa-miR-375	1	381	0.262467	-1.51072	0.0065	0.0235429	PKP4
hsa-miR-10b	1	418	0.239234	-1.63677	0.0065	0.0235429	MAP7D3
hsa-miR-1297	1	418	0.239234	-1.63677	0.0065	0.0235429	MAP7D3
hsa-miR-26a	1	536	0.186567	-2.00087	0.0065	0.0235429	MAP7D3
hsa-miR-330-5p	1	537	0.18622	-2.00376	0.0065	0.0235429	MAP7D3
hsa-miR-422a	1	597	0.167504	-2.17251	0.0065	0.0235429	MAP7D3
hsa-miR-411*	1	69	1.44928	0.364521	0.007	0.0235429	RNF212
hsa-miR-192*	1	71	1.40845	0.335265	0.007	0.0235429	RNF212
hsa-miR-379*	1	71	1.40845	0.335265	0.007	0.0235429	RNF212
hsa-miR-195*	1	77	1.2987	0.252508	0.007	0.0235429	RNF212
hsa-miR-187*	1	92	1.08696	0.0719329	0.007	0.0235429	ULK2
hsa-miR-7-1*	1	95	1.05263	0.0394319	0.007	0.0235429	RNF212
hsa-miR-146a*	1	98	1.02041	0.00793553	0.007	0.0235429	ULK2
hsa-miR-16-2*	1	100	1	-0.0125379	0.007	0.0235429	RNF212
hsa-miR-19b-2*	1	101	0.990099	-0.0226245	0.007	0.0235429	ULK2
hsa-miR-7-2*	1	102	0.980392	-0.032614	0.007	0.0235429	RNF212
hsa-miR-16-1*	1	103	0.970874	-0.0425085	0.007	0.0235429	RNF212
hsa-miR-19a*	1	103	0.970874	-0.0425085	0.007	0.0235429	ULK2
hsa-miR-216	1	112	0.892857	-0.127605	0.007	0.0235429	ULK2
hsa-miR-518a	1	121	0.826446	-0.206444	0.007	0.0235429	ULK2
hsa-miR-380-5p	1	122	0.819672	-0.214863	0.007	0.0235429	ULK2
hsa-miR-339-3p	1	139	0.719424	-0.349113	0.007	0.0235429	ULK2
hsa-miR-518d-3p	1	149	0.671141	-0.42137	0.007	0.0235429	ULK2
hsa-miR-876-3p	1	151	0.662252	-0.43531	0.007	0.0235429	ULK2
hsa-miR-323-5p	1	159	0.628931	-0.489529	0.007	0.0235429	ULK2
hsa-miR-518a-3p	1	170	0.588235	-0.560416	0.007	0.0235429	ULK2
hsa-miR-516a-3p	1	181	0.552486	-0.627584	0.007	0.0235429	ULK2
hsa-miR-325	1	234	0.42735	-0.911854	0.007	0.0235429	ULK2
hsa-miR-609	1	264	0.378788	-1.05166	0.007	0.0235429	ULK2
hsa-miR-520f	1	280	0.357143	-1.12161	0.007	0.0235429	ULK2
hsa-miR-515-5p	1	281	0.355872	-1.12589	0.007	0.0235429	ULK2
hsa-miR-191*	1	332	0.301205	-1.33163	0.007	0.0235429	ULK2
hsa-miR-615	1	360	0.277778	-1.43585	0.007	0.0235429	ULK2
hsa-miR-34c	1	368	0.271739	-1.46469	0.007	0.0235429	ULK2
hsa-miR-874	2	383	0.522193	-0.990309	0.007	0.0235429	CAPN10, MAPK11
hsa-miR-512-3p	1	406	0.246305	-1.59665	0.007	0.0235429	ULK2
hsa-miR-198	1	432	0.231481	-1.68274	0.007	0.0235429	ULK2
hsa-miR-190b	1	436	0.229358	-1.69572	0.007	0.0235429	FUT8
hsa-miR-496	1	451	0.221729	-1.74378	0.007	0.0235429	ULK2
hsa-miR-384	1	453	0.220751	-1.75012	0.007	0.0235429	C11orf73
hsa-miR-602	1	456	0.219298	-1.7596	0.007	0.0235429	ULK2
hsa-miR-758	1	457	0.218818	-1.76276	0.007	0.0235429	RNF212
hsa-miR-190	1	460	0.217391	-1.77219	0.007	0.0235429	FUT8
hsa-miR-101	1	543	0.184162	-2.02105	0.007	0.0235429	RNF212
hsa-miR-98	1	580	0.172414	-2.12558	0.007	0.0235429	FUT8
hsa-let-7f	1	620	0.16129	-2.23498	0.007	0.0235429	FUT8
hsa-miR-150	1	644	0.15528	-2.29902	0.007	0.0235429	ULK2
hsa-let-7d	1	662	0.151057	-2.34634	0.007	0.0235429	FUT8
hsa-miR-875-5p	2	315	0.634921	-0.687467	0.0075	0.025122	SLC39A8, CAPN10
hsa-let-7i*	1	119	0.840336	-0.18941	0.008	0.0264739	VWA5A
hsa-miR-202*	2	145	1.37931	0.446647	0.008	0.0264739	CAPN10, FAHD2B
hsa-miR-204	1	684	0.146199	-2.4034	0.008	0.0264739	CCDC84
hsa-miR-210	2	368	0.543478	-0.927345	0.0085	0.0277937	CAPN10, TDRKH
hsa-miR-7	2	626	0.319489	-1.82938	0.0085	0.0277937	CAPN10, COX11
hsa-miR-590-3p	2	1168	0.171233	-3.19823	0.0085	0.0277937	CAPN10, COX11
hsa-miR-151-5p	2	151	1.3245	0.387899	0.009	0.0290824	TPM1, CAPN10
hsa-miR-191	2	258	0.775194	-0.389058	0.009	0.0290824	TDRKH, ZNF397
hsa-miR-576	1	32	3.125	1.19681	0.0095	0.0290824	NF2
hsa-miR-222*	1	97	1.03093	0.018327	0.0095	0.0290824	NF2
hsa-miR-29c*	1	119	0.840336	-0.18941	0.0095	0.0290824	NF2
hsa-miR-545	1	165	0.606061	-0.528688	0.0095	0.0290824	NF2
hsa-miR-597	1	259	0.3861	-1.02919	0.0095	0.0290824	NF2
hsa-miR-801	1	298	0.33557	-1.19707	0.0095	0.0290824	NF2
hsa-miR-483	1	343	0.291545	-1.37322	0.0095	0.0290824	NF2
hsa-miR-512-5p	1	435	0.229885	-1.69248	0.0095	0.0290824	NF2
hsa-miR-329	2	478	0.41841	-1.35196	0.0095	0.0290824	SLC39A8, FAHD2B
hsa-miR-505	2	509	0.392927	-1.45904	0.0095	0.0290824	SLC39A8, FAHD2B
hsa-miR-34c-5p	2	527	0.379507	-1.51926	0.0095	0.0290824	NOP56, MAP7D3
hsa-miR-154	2	415	0.481928	-1.11869	0.01	0.0290824	SLC39A8, UBXN2A
hsa-miR-146b-5p	2	465	0.430108	-1.30567	0.01	0.0290824	SLC39A8, COX11
hsa-miR-135a	2	580	0.344828	-1.68931	0.01	0.0290824	SLC39A8, ADCY6
hsa-miR-17	2	617	0.324149	-1.80247	0.01	0.0290824	RPS20, SLC39A8
hsa-miR-182	2	619	0.323102	-1.80847	0.01	0.0290824	MBD2, TDRKH
hsa-miR-410	2	657	0.304414	-1.92042	0.01	0.0290824	RPSA, TDRKH
hsa-miR-20b	2	710	0.28169	-2.0707	0.01	0.0290824	RPS20, SLC39A8
hsa-miR-20a	2	715	0.27972	-2.08456	0.01	0.0290824	RPS20, SLC39A8
hsa-miR-23b	2	727	0.275103	-2.11762	0.01	0.0290824	ADAM28, SLC39A8
hsa-miR-106a	2	735	0.272109	-2.1395	0.01	0.0290824	RPS20, SLC39A8
hsa-miR-93	2	762	0.262467	-2.21247	0.01	0.0290824	RPS20, SLC39A8
hsa-miR-92	2	188	1.06383	0.0714921	0.0105	0.0290824	FAHD2B, TDRKH
hsa-miR-630	2	205	0.97561	-0.0536021	0.0105	0.0290824	ITLN1, TDRKH
hsa-miR-604	2	406	0.492611	-1.08334	0.0105	0.0290824	FAHD2B, TDRKH
hsa-miR-491-5p	2	421	0.475059	-1.14195	0.0105	0.0290824	SLC39A8, RELL1
hsa-miR-382	2	587	0.340716	-1.71105	0.0105	0.0290824	COX11, ITLN1
hsa-miR-22	2	646	0.309598	-1.8884	0.0105	0.0290824	SIRT5, RPSA
hsa-miR-15a	2	737	0.27137	-2.14495	0.0105	0.0290824	SIRT5, SLC39A8
hsa-miR-526a	2	136	1.47059	0.539775	0.011	0.0290824	ANKAR, TDRKH
hsa-miR-526c	2	198	1.0101	-0.00335438	0.011	0.0290824	ANKAR, TDRKH
hsa-miR-555	2	219	0.913242	-0.149378	0.011	0.0290824	ITLN1, RELL1
hsa-miR-127	2	279	0.716846	-0.505002	0.011	0.0290824	ANKAR, TDRKH
hsa-miR-423	2	304	0.657895	-0.633648	0.011	0.0290824	TPM1, FAHD2B
hsa-miR-636	2	368	0.543478	-0.927345	0.011	0.0290824	TPM1, FAHD2B
hsa-miR-339	2	397	0.503778	-1.04742	0.011	0.0290824	TPM1, FAHD2B
hsa-miR-623	2	445	0.449438	-1.23266	0.011	0.0290824	TPM1, FAHD2B
hsa-miR-92a	2	448	0.446429	-1.24376	0.011	0.0290824	MAP7D3, RPSA
hsa-miR-769-3p	2	460	0.434783	-1.28762	0.011	0.0290824	TPM1, ITLN1
hsa-miR-432	2	473	0.422833	-1.33426	0.011	0.0290824	ULK2, UBAP2
hsa-miR-216a	2	487	0.410678	-1.38352	0.011	0.0290824	COX11, ADCY6
hsa-miR-371-5p	2	522	0.383142	-1.50267	0.011	0.0290824	MAP7D3, SLC39A8
hsa-miR-92b	2	529	0.378072	-1.52587	0.011	0.0290824	MAP7D3, RPSA
hsa-miR-367	2	540	0.37037	-1.56193	0.011	0.0290824	MAP7D3, RPSA
hsa-miR-661	2	634	0.315457	-1.85312	0.011	0.0290824	TPM1, FAHD2B
hsa-miR-663	2	649	0.308166	-1.89716	0.011	0.0290824	TPM1, FAHD2B
hsa-miR-328	2	691	0.289436	-2.01755	0.011	0.0290824	WDR37, FAHD2B
hsa-miR-374a*	2	74	2.7027	1.4613	0.0115	0.0290824	RELL1, TDRKH
hsa-miR-509-3-5p	2	100	2	0.994676	0.0115	0.0290824	RELL1, TDRKH
hsa-miR-520d	2	194	1.03093	0.0261331	0.0115	0.0290824	TPM1, ANKAR
hsa-miR-640	1	244	0.409836	-0.959836	0.0115	0.0290824	UBAP2
hsa-miR-147	2	283	0.706714	-0.526225	0.0115	0.0290824	TPM1, ANKAR
hsa-miR-519e	2	285	0.701754	-0.536741	0.0115	0.0290824	TPM1, COX11
hsa-miR-634	1	332	0.301205	-1.33163	0.0115	0.0290824	UBAP2
hsa-miR-219-5p	2	364	0.549451	-0.910225	0.0115	0.0290824	COX11, RELL1
hsa-miR-770-5p	2	380	0.526316	-0.977868	0.0115	0.0290824	TPM1, TDRKH
hsa-miR-518c*	2	471	0.424628	-1.32714	0.0115	0.0290824	TPM1, TDRKH
hsa-miR-433	2	511	0.391389	-1.4658	0.0115	0.0290824	SIRT5, ADCY6
hsa-miR-320a	2	521	0.383877	-1.49934	0.0115	0.0290824	SIRT5, COX11
hsa-miR-320b	2	521	0.383877	-1.49934	0.0115	0.0290824	SIRT5, COX11
hsa-miR-206	2	545	0.366972	-1.57817	0.0115	0.0290824	SIRT5, COX11
hsa-miR-148b	2	613	0.326264	-1.79043	0.0115	0.0290824	COX11, RELL1
hsa-miR-152	2	665	0.300752	-1.94352	0.0115	0.0290824	COX11, RELL1
hsa-miR-302c*	2	124	1.6129	0.67483	0.012	0.0290824	ULK2, ITLN1
hsa-miR-519b-3p	2	161	1.24224	0.295195	0.012	0.0290824	TPM1, RELL1
hsa-miR-514	2	174	1.14943	0.183136	0.012	0.0290824	SIRT5, TPM1
hsa-miR-511	2	267	0.749064	-0.43972	0.012	0.0290824	ULK2, FAHD2B
hsa-miR-519a	2	268	0.746269	-0.445256	0.012	0.0290824	TPM1, RELL1
hsa-miR-645	2	300	0.666667	-0.613678	0.012	0.0290824	ULK2, FAHD2B
hsa-miR-452*	2	334	0.598802	-0.776915	0.012	0.0290824	ULK2, UTRN
hsa-miR-379	2	347	0.576369	-0.835792	0.012	0.0290824	MAP7D3, RELL1
hsa-miR-767-3p	2	369	0.542005	-0.931603	0.012	0.0290824	ULK2, FAHD2B
hsa-miR-560	2	388	0.515464	-1.01088	0.012	0.0290824	TPM1, RELL1
hsa-miR-34b	2	409	0.488998	-1.09519	0.012	0.0290824	ULK2, FAHD2B
hsa-miR-296	2	449	0.445434	-1.24744	0.012	0.0290824	ULK2, FAHD2B
hsa-miR-331	2	452	0.442478	-1.25847	0.012	0.0290824	ULK2, FAHD2B
hsa-miR-484	2	477	0.419287	-1.34843	0.012	0.0290824	ULK2, FAHD2B
hsa-miR-221	2	488	0.409836	-1.387	0.012	0.0290824	CAPN10, NF2
hsa-miR-338-3p	2	513	0.389864	-1.47254	0.012	0.0290824	SIRT5, RELL1
hsa-miR-26b	2	555	0.36036	-1.61037	0.012	0.0290824	MAP7D3, COX11
hsa-let-7a	2	656	0.304878	-1.91752	0.012	0.0290824	FUT8, TDRKH
hsa-let-7c	2	682	0.293255	-1.9921	0.012	0.0290824	FUT8, TDRKH
hsa-let-7i	2	683	0.292826	-1.99494	0.012	0.0290824	FUT8, TDRKH
hsa-miR-494	2	717	0.27894	-2.09009	0.012	0.0290824	MAP7D3, COX11
hsa-let-7b	2	750	0.266667	-2.1802	0.012	0.0290824	FUT8, TDRKH
hsa-miR-340	2	976	0.204918	-2.75262	0.012	0.0290824	ABCC4, TDRKH
hsa-miR-802	2	152	1.31579	0.378346	0.0125	0.0295977	RNF212, TDRKH
hsa-miR-99a	2	236	0.847458	-0.258273	0.0125	0.0295977	CARM1, RELL1
hsa-miR-142-3p	2	401	0.498753	-1.06346	0.0125	0.0295977	ANKAR, COX11
hsa-miR-202	2	490	0.408163	-1.39395	0.0125	0.0295977	ULK2, TDRKH
hsa-miR-520c-3p	2	529	0.378072	-1.52587	0.0125	0.0295977	RPS20, ULK2
hsa-miR-520b	2	600	0.333333	-1.75099	0.0125	0.0295977	RPS20, ULK2
hsa-miR-302b	2	631	0.316957	-1.84424	0.0125	0.0295977	RPS20, ULK2
hsa-miR-138	2	678	0.294985	-1.98073	0.0125	0.0295977	PKP4, RELL1
hsa-miR-19b-1*	2	111	1.8018	0.838413	0.013	0.0300056	ULK2, RELL1
hsa-miR-28-3p	2	122	1.63934	0.698723	0.013	0.0300056	ULK2, SIRT5
hsa-miR-556-5p	2	137	1.45985	0.529107	0.013	0.0300056	KIAA0664, TPM1
hsa-miR-199a*	2	183	1.0929	0.110389	0.013	0.0300056	ULK2, TPM1
hsa-miR-502	2	283	0.706714	-0.526225	0.013	0.0300056	ULK2, TPM1
hsa-miR-345	2	360	0.555556	-0.892958	0.013	0.0300056	ULK2, SIRT5
hsa-miR-572	2	405	0.493827	-1.07938	0.013	0.0300056	ULK2, TPM1
hsa-miR-611	2	407	0.4914	-1.0873	0.013	0.0300056	ULK2, TPM1
hsa-let-7g	2	663	0.301659	-1.93776	0.013	0.0300056	FUT8, SIRT5
hsa-miR-133b	2	689	0.290276	-2.01191	0.0135	0.0309	ULK2, ABCC4
hsa-miR-133a	2	712	0.280899	-2.07625	0.0135	0.0309	ULK2, ABCC4
hsa-miR-23a	3	733	0.409277	-1.7404	0.0135	0.0309	ADAM28, SLC39A8, ZNF397
hsa-miR-371	2	314	0.636943	-0.682639	0.014	0.0318674	SON, NF2
hsa-miR-155	2	502	0.398406	-1.43525	0.014	0.0318674	COX11, WHAMML2
hsa-miR-532	2	168	1.19048	0.233761	0.0145	0.0322919	FAHD2B, NF2
hsa-miR-649	2	225	0.888889	-0.188677	0.0145	0.0322919	FAHD2B, NF2
hsa-miR-642	2	402	0.497512	-1.06745	0.0145	0.0322919	FAHD2B, NF2
hsa-miR-324-3p	2	561	0.356506	-1.62951	0.0145	0.0322919	FAHD2B, NF2
hsa-miR-200b	3	580	0.517241	-1.25305	0.0145	0.0322919	MBD2, SLC39A8, COX11
hsa-miR-200c	3	599	0.500835	-1.3179	0.0145	0.0322919	MBD2, SLC39A8, COX11
hsa-miR-429	3	607	0.494234	-1.34478	0.0145	0.0322919	MBD2, SLC39A8, COX11
hsa-miR-211	2	706	0.283286	-2.05957	0.0145	0.0322919	CCDC15, CCDC84
hsa-miR-574-5p	2	142	1.40845	0.476989	0.015	0.0326984	TDRKH, NF2
hsa-miR-520a*	2	299	0.668896	-0.60865	0.015	0.0326984	TDRKH, NF2
hsa-miR-449a	3	514	0.583658	-1.01526	0.015	0.0326984	NOP56, MAP7D3, ADCY6
hsa-miR-205	3	653	0.459418	-1.49487	0.015	0.0326984	SLC39A8, FAHD2B, COX11
hsa-miR-374b	3	703	0.426743	-1.65039	0.015	0.0326984	RPS20, CAPN10, RNF212
hsa-miR-374a	3	736	0.407609	-1.74927	0.015	0.0326984	RPS20, CAPN10, RNF212
hsa-miR-449b	3	770	0.38961	-1.84842	0.015	0.0326984	NOP56, MAP7D3, ADCY6
hsa-miR-370	3	786	0.381679	-1.89419	0.015	0.0326984	SLC39A8, FAHD2B, TDRKH
hsa-miR-10a	3	464	0.646552	-0.81942	0.0155	0.0335223	SIRT5, MAP7D3, CAPN10
hsa-miR-18a	3	566	0.530035	-1.2043	0.0155	0.0335223	SLC39A8, COX11, TDRKH
hsa-miR-488	3	661	0.453858	-1.52025	0.0155	0.0335223	EVC, CAPN10, COX11
hsa-miR-766	3	524	0.572519	-1.05267	0.016	0.0343333	ULK2, FAHD2B, UTRN
hsa-miR-33a	3	525	0.571429	-1.05638	0.016	0.0343333	ULK2, SIRT5, CAPN10
hsa-miR-33b	3	578	0.519031	-1.24614	0.016	0.0343333	ULK2, SIRT5, CAPN10
hsa-miR-193a-5p	3	170	1.76471	0.993787	0.0165	0.0344203	TPM1, FAHD2B, TDRKH
hsa-miR-518c	2	244	0.819672	-0.307052	0.0165	0.0344203	ULK2, NF2
hsa-miR-518e	2	244	0.819672	-0.307052	0.0165	0.0344203	ULK2, NF2
hsa-miR-518f	2	251	0.796813	-0.348565	0.0165	0.0344203	ULK2, NF2
hsa-miR-519e*	2	261	0.766284	-0.406116	0.0165	0.0344203	ULK2, NF2
hsa-miR-516-3p	2	278	0.719424	-0.499655	0.0165	0.0344203	ULK2, NF2
hsa-miR-644	3	322	0.931677	-0.148798	0.0165	0.0344203	TPM1, CCDC15, UTRN
hsa-miR-575	3	384	0.78125	-0.467668	0.0165	0.0344203	TPM1, FAHD2B, TDRKH
hsa-miR-361-5p	3	434	0.691244	-0.69382	0.0165	0.0344203	SIRT5, SLC39A8, TYW1
hsa-miR-599	3	456	0.657895	-0.786577	0.0165	0.0344203	SIRT5, COX11, PHACTR4
hsa-miR-107	3	747	0.401606	-1.78164	0.0165	0.0344203	SIRT5, ADCY6, TDRKH
hsa-miR-548b	3	103	2.91262	1.94287	0.017	0.0348458	EIF4G3, TPM1, TDRKH
hsa-miR-923	3	134	2.23881	1.43397	0.017	0.0348458	TPM1, COX11, TDRKH
hsa-miR-557	3	295	1.01695	0.00791791	0.017	0.0348458	TPM1, FAHD2B, RELL1
hsa-miR-490	2	327	0.611621	-0.74445	0.017	0.0348458	UBAP2, TDRKH
hsa-miR-124	3	494	0.607287	-0.93876	0.017	0.0348458	TPM1, SOCS7, TDRKH
hsa-miR-383	3	554	0.541516	-1.16184	0.017	0.0348458	MAP7D3, SLC39A8, TPM1
hsa-miR-125a-3p	3	591	0.507614	-1.29077	0.017	0.0348458	COX11, RELL1, TDRKH
hsa-miR-363*	3	346	0.867052	-0.278241	0.0175	0.0354833	ULK2, FAHD2B, TDRKH
hsa-miR-652	3	371	0.808625	-0.404788	0.0175	0.0354833	ULK2, FAHD2B, TDRKH
hsa-miR-212	3	613	0.489396	-1.36478	0.0175	0.0354833	ULK2, SIRT5, SON
hsa-miR-593	3	622	0.482315	-1.39453	0.0175	0.0354833	ULK2, FAHD2B, TDRKH
hsa-miR-296-3p	3	439	0.683371	-0.715229	0.018	0.0354833	MRPL37, SIRT5, TPM1
hsa-miR-376a	3	491	0.610998	-0.927083	0.018	0.0354833	MAP7D3, TPM1, TDRKH
hsa-miR-654	3	496	0.604839	-0.946515	0.018	0.0354833	ULK2, TPM1, FAHD2B
hsa-miR-520a-3p	3	509	0.589391	-0.996349	0.018	0.0354833	RPS20, ULK2, ADCY6
hsa-miR-376b	3	517	0.580271	-1.02654	0.018	0.0354833	MAP7D3, TPM1, TDRKH
hsa-miR-520d-3p	3	539	0.556586	-1.10781	0.018	0.0354833	RPS20, ULK2, ADCY6
hsa-miR-873	3	565	0.530973	-1.20079	0.018	0.0354833	ULK2, MAP7D3, SLC39A8
hsa-miR-302d	3	644	0.465839	-1.46607	0.018	0.0354833	RPS20, ULK2, ADCY6
hsa-miR-302a	3	653	0.459418	-1.49487	0.018	0.0354833	RPS20, ULK2, ANKAR
hsa-miR-608	3	684	0.438596	-1.59214	0.018	0.0354833	ULK2, TPM1, FAHD2B
hsa-let-7e	3	721	0.416089	-1.70467	0.018	0.0354833	FUT8, TPM1, TDRKH
hsa-miR-539	3	779	0.385109	-1.87423	0.018	0.0354833	SIRT5, MAP7D3, COX11
hsa-miR-515-3p	3	353	0.849858	-0.314469	0.0185	0.0358682	ULK2, TPM1, COX11
hsa-miR-132	3	601	0.499168	-1.32464	0.0185	0.0358682	ULK2, SIRT5, COX11
hsa-miR-520e	3	613	0.489396	-1.36478	0.0185	0.0358682	RPS20, ULK2, SIRT5
hsa-miR-30a	3	625	0.48	-1.40439	0.0185	0.0358682	ABCC4, MAP7D3, TDRKH
hsa-miR-30d	3	629	0.476948	-1.41747	0.0185	0.0358682	ABCC4, MAP7D3, TDRKH
hsa-miR-30c	3	637	0.470958	-1.44349	0.0185	0.0358682	ABCC4, MAP7D3, TDRKH
hsa-miR-302c	3	675	0.444444	-1.5642	0.0185	0.0358682	RPS20, ULK2, SIRT5
hsa-miR-128b	3	319	0.940439	-0.132003	0.019	0.0365794	TSC2, TPM1, NF2
hsa-miR-194	3	497	0.603622	-0.950384	0.019	0.0365794	MAP7D3, RNF212, TDRKH
hsa-miR-34a	3	779	0.385109	-1.87423	0.019	0.0365794	ULK2, MAP7D3, ANKAR
hsa-miR-222	3	452	0.663717	-0.769984	0.0195	0.0371944	UBAP2, CAPN10, FAHD2B
hsa-miR-32	4	518	0.772201	-0.571257	0.0195	0.0371944	RPS20, MAP7D3, CAPN10, RPSA
hsa-miR-424	3	711	0.421941	-1.67462	0.0195	0.0371944	SLC39A8, RELL1, NF2
hsa-miR-378	3	713	0.420757	-1.68065	0.0195	0.0371944	ULK2, MAP7D3, TPM1
hsa-miR-105	3	182	1.64835	0.870111	0.02	0.0378851	ULK2, TPM1, RNF212
hsa-miR-103	4	726	0.550964	-1.32432	0.02	0.0378851	SIRT5, MCCC2, ADCY6, TDRKH
hsa-miR-15b	3	764	0.39267	-1.83111	0.02	0.0378851	SIRT5, SLC39A8, NF2
hsa-miR-9	4	730	0.547945	-1.33716	0.0205	0.0387431	SIRT5, MAP7D3, GRHL1, TDRKH
hsa-miR-338	3	270	1.11111	0.165683	0.021	0.0393273	UBAP2, TDRKH, DNAH10
hsa-miR-510	3	441	0.680272	-0.723737	0.021	0.0393273	TPM1, RELL1, NF2
hsa-miR-217	4	582	0.687285	-0.824345	0.021	0.0393273	MAP7D3, SLC39A8, COX11, RPSA
hsa-miR-185	3	713	0.420757	-1.68065	0.021	0.0393273	TPM1, TDRKH, NF2
hsa-miR-601	3	359	0.835655	-0.345017	0.0215	0.0399009	ULK2, FAHD2B, NF2
hsa-miR-183	4	576	0.694444	-0.801587	0.0215	0.0399009	AACS, MBD2, FAHD2B, TYW1
hsa-miR-506	4	625	0.64	-0.982369	0.0215	0.0399009	SLC39A8, TPM1, SOCS7, TDRKH
hsa-miR-485-5p	4	839	0.476758	-1.67049	0.0215	0.0399009	RPS20, MAP7D3, SLC39A8, FAHD2B
hsa-miR-588	4	425	0.941176	-0.152224	0.022	0.0401951	ULK2, FAHD2B, SON, TDRKH
hsa-miR-31	3	517	0.580271	-1.02654	0.022	0.0401951	MAP7D3, TPM1, NF2
hsa-miR-18b	4	536	0.746269	-0.644876	0.022	0.0401951	MAP7D3, SLC39A8, COX11, TDRKH
hsa-miR-299-3p	4	557	0.718133	-0.728269	0.022	0.0401951	MAP7D3, SLC39A8, ANKAR, ADCY6
hsa-miR-29b	4	568	0.704225	-0.770953	0.022	0.0401951	C14orf45, MAP7D3, MBD2, TDRKH
hsa-miR-300	4	625	0.64	-0.982369	0.022	0.0401951	RPS20, MAP7D3, MBD2, TDRKH
hsa-miR-381	4	655	0.610687	-1.08785	0.022	0.0401951	RPS20, MAP7D3, MBD2, TDRKH
hsa-miR-326	4	809	0.494438	-1.58165	0.0225	0.0410177	ULK2, FAHD2B, ITLN1, TDRKH
hsa-miR-153	3	446	0.672646	-0.744872	0.023	0.0413799	UBAP2, RELL1, TDRKH
hsa-miR-650	4	577	0.693241	-0.805393	0.023	0.0413799	EIF4G3, ULK2, TPM1, FAHD2B
hsa-miR-30e	4	637	0.627943	-1.025	0.023	0.0413799	ABCC4, MAP7D3, SLC39A8, TDRKH
hsa-miR-637	4	697	0.573888	-1.22978	0.023	0.0413799	ULK2, FAHD2B, ANKAR, TDRKH
hsa-miR-145	4	729	0.548697	-1.33395	0.023	0.0413799	MDN1, CAPN10, TDRKH, MAPK11
hsa-miR-214	4	953	0.419727	-1.99192	0.023	0.0413799	CDK11A, ULK2, RPSA, TDRKH
hsa-miR-558	3	295	1.01695	0.00791791	0.0235	0.0417328	ULK2, UBAP2, TPM1
hsa-miR-363	4	524	0.763359	-0.596027	0.0235	0.0417328	RPS20, ULK2, MAP7D3, RPSA
hsa-miR-653	5	526	0.95057	-0.148372	0.0235	0.0417328	MAP7D3, CAPN10, FAHD2B, ADCY6, ZNF397
hsa-miR-431	4	569	0.702988	-0.7748	0.0235	0.0417328	SIRT5, TPM1, FAHD2B, PKP4
hsa-miR-218	5	582	0.859107	-0.388748	0.0235	0.0417328	GCOM1, SLC39A8, TPM1, CAPN10, ADCY6
hsa-miR-612	4	662	0.60423	-1.11195	0.0235	0.0417328	ULK2, TPM1, FAHD2B, TDRKH
hsa-miR-373	4	662	0.60423	-1.11195	0.024	0.0424378	RPS20, ULK2, TPM1, ADCY6
hsa-miR-495	4	796	0.502513	-1.54251	0.024	0.0424378	ABCC4, MAP7D3, COX11, TDRKH
hsa-miR-448	4	560	0.714286	-0.739976	0.0245	0.0430448	MAP7D3, COX11, RRM1, TDRKH
hsa-miR-543	4	668	0.598802	-1.13246	0.0245	0.0430448	MBD2, COX11, ITLN1, NF2
hsa-miR-181a	5	683	0.732064	-0.777279	0.0245	0.0430448	SIRT5, SLC39A8, NUBPL, COX11, ITLN1
hsa-miR-128a	4	386	1.03627	0.0483197	0.025	0.0436441	TSC2, SIRT5, TPM1, NF2
hsa-miR-196a	3	504	0.595238	-0.977298	0.025	0.0436441	FUT8, MAP7D3, UBAP2
hsa-miR-149	4	837	0.477897	-1.66463	0.025	0.0436441	MAP7D3, TPM1, FAHD2B, C9orf174
hsa-miR-216b	4	532	0.75188	-0.628693	0.0255	0.0444228	SIRT5, C11orf73, ANKAR, TDRKH
hsa-miR-658	4	613	0.652529	-0.939123	0.027	0.0468379	ULK2, FAHD2B, TDRKH, NF2
hsa-miR-181c	5	659	0.758725	-0.689355	0.027	0.0468379	SIRT5, SLC39A8, TPM1, COX11, ITLN1
hsa-miR-425	5	423	1.18203	0.361287	0.0275	0.047605	CD40, MAP7D3, TOE1, TPM1, COX11
hsa-miR-768-5p	4	509	0.785855	-0.533654	0.028	0.0482678	ULK2, TPM1, TDRKH, NF2
hsa-miR-196b	4	515	0.776699	-0.558784	0.028	0.0482678	FUT8, UBAP2, ITLN1, TDRKH
hsa-miR-337	5	361	1.38504	0.729278	0.029	0.0496798	ULK2, TPM1, FAHD2B, ANKAR, TDRKH
hsa-miR-25	5	559	0.894454	-0.292547	0.029	0.0496798	RPS20, ULK2, MAP7D3, RPSA, TDRKH
hsa-miR-181d	6	757	0.792602	-0.646114	0.029	0.0496798	SIRT5, SLC39A8, TPM1, CAPN10, UTRN, COX11

## Sheet: S5B
Table S5C
Enrichment of miRNA binding sites in PD leukocyte detected exons (by splicing-index analysis) compared to HC
microRNA-Name	Number Changed	Number Measured	Percent Changed	Zscore	PermuteP	AdjP	Changed GeneSymbols
hsa-miR-765	1	580	0.172414	-2.73971	0.004	0.0340183	MGA
hsa-miR-30e-3p	1	128	0.78125	-0.659647	0.0045	0.0340183	FRY
hsa-miR-513	1	308	0.324675	-1.72104	0.005	0.0340183	C2CD3
hsa-miR-652	1	371	0.269542	-1.99023	0.005	0.0340183	NCSTN
hsa-miR-223	1	470	0.212766	-2.36621	0.005	0.0340183	NCSTN
hsa-miR-7	1	626	0.159744	-2.88614	0.005	0.0340183	NCSTN
hsa-miR-141*	1	91	1.0989	-0.30138	0.0055	0.0340183	MINA
hsa-miR-200c*	1	93	1.07527	-0.323763	0.0055	0.0340183	MINA
hsa-miR-16-1*	1	103	0.970874	-0.42959	0.0055	0.0340183	MINA
hsa-let-7i*	1	119	0.840336	-0.581589	0.0055	0.0340183	C9orf85
hsa-miR-513-5p	1	155	0.645161	-0.869835	0.0055	0.0340183	C9orf85
hsa-miR-671-3p	1	162	0.617284	-0.919603	0.0055	0.0340183	MINA
hsa-miR-520a-5p	1	166	0.60241	-0.947312	0.0055	0.0340183	MINA
hsa-miR-105	1	182	0.549451	-1.05341	0.0055	0.0340183	MINA
hsa-miR-520a*	1	299	0.334448	-1.68001	0.0055	0.0340183	MINA
hsa-miR-125a	1	320	0.3125	-1.77464	0.0055	0.0340183	MINA
hsa-miR-191*	1	332	0.301205	-1.82706	0.0055	0.0340183	RPS6KA3
hsa-miR-554	1	332	0.301205	-1.82706	0.0055	0.0340183	MINA
hsa-miR-615	1	360	0.277778	-1.94524	0.0055	0.0340183	MINA
hsa-miR-542-5p	1	365	0.273973	-1.96578	0.0055	0.0340183	MINA
hsa-miR-187	1	422	0.236967	-2.18977	0.0055	0.0340183	MINA
hsa-miR-646	1	424	0.235849	-2.19733	0.0055	0.0340183	MINA
hsa-miR-519c	1	109	0.917431	-0.48882	0.006	0.0340183	C2CD3
hsa-miR-558	1	295	0.338983	-1.66153	0.006	0.0340183	C2CD3
hsa-miR-875-5p	1	315	0.31746	-1.75246	0.006	0.0340183	CUL5
hsa-miR-337	1	361	0.277008	-1.94936	0.006	0.0340183	C2CD3
hsa-miR-492	1	385	0.25974	-2.04642	0.006	0.0340183	C2CD3
hsa-miR-631	1	403	0.248139	-2.11705	0.006	0.0340183	C2CD3
hsa-miR-135a	1	580	0.172414	-2.73971	0.006	0.0340183	CUL5
hsa-miR-548d	1	65	1.53846	0.0411748	0.0065	0.0340183	EDC4
hsa-miR-335*	1	90	1.11111	-0.290021	0.0065	0.0340183	INPP4A
hsa-miR-516-5p	1	221	0.452489	-1.28642	0.0065	0.0340183	INPP4A
hsa-miR-100	1	225	0.444444	-1.30865	0.0065	0.0340183	DLEU1
hsa-miR-342	1	250	0.4	-1.44191	0.0065	0.0340183	EDC4
hsa-miR-99b	1	251	0.398406	-1.44706	0.0065	0.0340183	DLEU1
hsa-miR-769-5p	1	358	0.27933	-1.93698	0.0065	0.0340183	EDC4
hsa-miR-575	1	384	0.260417	-2.04245	0.0065	0.0340183	EDC4
hsa-miR-619	1	389	0.257069	-2.06227	0.0065	0.0340183	INPP4A
hsa-miR-320	1	420	0.238095	-2.1822	0.0065	0.0340183	EDC4
hsa-miR-625	1	441	0.226757	-2.26079	0.0065	0.0340183	EDC4
hsa-miR-190	1	460	0.217391	-2.33024	0.0065	0.0340183	INPP4A
hsa-miR-199b-5p	1	492	0.203252	-2.44402	0.0065	0.0340183	NUP214
hsa-miR-654	1	496	0.201613	-2.45798	0.0065	0.0340183	INPP4A
hsa-miR-382	1	587	0.170358	-2.76231	0.0065	0.0340183	DLEU1
hsa-miR-658	1	613	0.163132	-2.84524	0.0065	0.0340183	ZRANB2
hsa-miR-593	1	622	0.160772	-2.87359	0.0065	0.0340183	EDC4
hsa-miR-122*	1	71	1.40845	-0.0482852	0.007	0.0340183	ZNRD1-AS1
hsa-miR-20b*	1	71	1.40845	-0.0482852	0.007	0.0340183	C1orf84
hsa-miR-374a*	1	74	1.35135	-0.0902719	0.007	0.0340183	RELL1
hsa-miR-132*	1	88	1.13636	-0.266952	0.007	0.0340183	RELL1
hsa-miR-541*	1	89	1.1236	-0.278546	0.007	0.0340183	ZNRD1-AS1
hsa-miR-218-1*	1	93	1.07527	-0.323763	0.007	0.0340183	C1orf84
hsa-miR-148a*	1	94	1.06383	-0.334791	0.007	0.0340183	RELL1
hsa-miR-136*	1	97	1.03093	-0.367255	0.007	0.0340183	C1orf84
hsa-miR-99a*	1	104	0.961538	-0.439666	0.007	0.0340183	IARS2
hsa-miR-34b*	1	107	0.934579	-0.469398	0.007	0.0340183	C1orf84
hsa-miR-34c-3p	1	110	0.909091	-0.498416	0.007	0.0340183	C1orf84
hsa-miR-19b-1*	1	111	0.900901	-0.507937	0.007	0.0340183	RELL1
hsa-miR-99b*	1	114	0.877193	-0.536068	0.007	0.0340183	C1orf84
hsa-miR-374b*	1	119	0.840336	-0.581589	0.007	0.0340183	RELL1
hsa-miR-34a*	1	123	0.813008	-0.616865	0.007	0.0340183	C1orf84
hsa-miR-330-3p	1	124	0.806452	-0.625535	0.007	0.0340183	ZNRD1-AS1
hsa-miR-193b*	1	127	0.787402	-0.651202	0.007	0.0340183	RELL1
hsa-miR-188-5p	1	128	0.78125	-0.659647	0.007	0.0340183	C1orf84
hsa-miR-607	1	134	0.746269	-0.709217	0.007	0.0340183	C1orf84
hsa-miR-501-3p	1	136	0.735294	-0.725341	0.007	0.0340183	RELL1
hsa-miR-502-3p	1	138	0.724638	-0.741276	0.007	0.0340183	RELL1
hsa-miR-516b	1	153	0.653595	-0.855299	0.007	0.0340183	RELL1
hsa-miR-519b-3p	1	161	0.621118	-0.912595	0.007	0.0340183	RELL1
hsa-miR-886-3p	1	165	0.606061	-0.940433	0.007	0.0340183	RELL1
hsa-miR-586	1	168	0.595238	-0.960979	0.007	0.0340183	RELL1
hsa-miR-95	1	175	0.571429	-1.00788	0.007	0.0340183	ZNRD1-AS1
hsa-miR-624	1	205	0.487805	-1.19463	0.007	0.0340183	C1orf84
hsa-miR-649	1	225	0.444444	-1.30865	0.007	0.0340183	NPHP3
hsa-miR-573	1	242	0.413223	-1.40027	0.007	0.0340183	ZNRD1-AS1
hsa-miR-518c	1	244	0.409836	-1.41077	0.007	0.0340183	C1orf84
hsa-miR-518f	1	251	0.398406	-1.44706	0.007	0.0340183	C1orf84
hsa-miR-597	1	259	0.3861	-1.48774	0.007	0.0340183	C1orf84
hsa-miR-614	1	291	0.343643	-1.6429	0.007	0.0340183	C1orf84
hsa-miR-557	1	295	0.338983	-1.66153	0.007	0.0340183	RELL1
hsa-miR-645	1	300	0.333333	-1.6846	0.007	0.0340183	NPHP3
hsa-miR-589	1	310	0.322581	-1.73006	0.007	0.0340183	NPHP3
hsa-miR-486-5p	1	327	0.30581	-1.80536	0.007	0.0340183	TRMU
hsa-miR-379	1	347	0.288184	-1.89106	0.007	0.0340183	RELL1
hsa-miR-28-5p	1	372	0.268817	-1.99428	0.007	0.0340183	SPATA5L1
hsa-miR-560	1	388	0.257732	-2.05832	0.007	0.0340183	RELL1
hsa-miR-198	1	432	0.231481	-2.22736	0.007	0.0340183	NPHP3
hsa-miR-137	1	500	0.2	-2.47188	0.007	0.0340183	SPATA5L1
hsa-miR-371-5p	1	522	0.191571	-2.54743	0.007	0.0340183	KIF1B
hsa-miR-125a-3p	1	591	0.169205	-2.77518	0.007	0.0340183	RELL1
hsa-miR-520b	1	600	0.166667	-2.80398	0.007	0.0340183	C1orf84
hsa-miR-148a	1	608	0.164474	-2.82942	0.007	0.0340183	RELL1
hsa-miR-197	1	611	0.163666	-2.83892	0.007	0.0340183	C1orf84
hsa-miR-148b	1	613	0.163132	-2.84524	0.007	0.0340183	RELL1
hsa-miR-152	1	665	0.150376	-3.00672	0.007	0.0340183	RELL1
hsa-miR-424	1	711	0.140647	-3.14529	0.007	0.0340183	RELL1
hsa-miR-616*	1	87	1.14943	-0.255237	0.0075	0.0340183	C17orf57
hsa-miR-302d*	1	94	1.06383	-0.334791	0.0075	0.0340183	SLC16A5
hsa-miR-380	1	97	1.03093	-0.367255	0.0075	0.0340183	C17orf57
hsa-miR-33a*	1	101	0.990099	-0.409176	0.0075	0.0340183	C17orf57
hsa-miR-19a*	1	103	0.970874	-0.42959	0.0075	0.0340183	C17orf57
hsa-miR-628-3p	1	104	0.961538	-0.439666	0.0075	0.0340183	C17orf57
hsa-miR-888	1	112	0.892857	-0.517386	0.0075	0.0340183	C17orf57
hsa-miR-199a-3p	1	122	0.819672	-0.608136	0.0075	0.0340183	C17orf57
hsa-miR-302c*	1	124	0.806452	-0.625535	0.0075	0.0340183	C17orf57
hsa-miR-302b*	1	130	0.769231	-0.676376	0.0075	0.0340183	SLC16A5
hsa-miR-490-5p	1	134	0.746269	-0.709217	0.0075	0.0340183	C17orf57
hsa-miR-527	1	134	0.746269	-0.709217	0.0075	0.0340183	NCSTN
hsa-miR-876-3p	1	151	0.662252	-0.840616	0.0075	0.0340183	SLC16A5
hsa-miR-455-3p	1	155	0.645161	-0.869835	0.0075	0.0340183	NCSTN
hsa-miR-323-5p	1	159	0.628931	-0.898479	0.0075	0.0340183	SLC16A5
hsa-miR-423-5p	1	164	0.609756	-0.933521	0.0075	0.0340183	C17orf57
hsa-miR-562	1	182	0.549451	-1.05341	0.0075	0.0340183	SLC16A5
hsa-miR-199a*	1	183	0.546448	-1.05981	0.0075	0.0340183	NCSTN
hsa-miR-520h	1	184	0.543478	-1.06618	0.0075	0.0340183	SLC16A5
hsa-miR-630	1	205	0.487805	-1.19463	0.0075	0.0340183	C17orf57
hsa-miR-517a	1	211	0.473934	-1.22961	0.0075	0.0340183	NCSTN
hsa-miR-330	1	229	0.436681	-1.33061	0.0075	0.0340183	NCSTN
hsa-miR-591	1	264	0.378788	-1.51275	0.0075	0.0340183	NCSTN
hsa-miR-127	1	279	0.358423	-1.58603	0.0075	0.0340183	NCSTN
hsa-miR-192	1	309	0.323625	-1.72555	0.0075	0.0340183	NCSTN
hsa-miR-452*	1	334	0.299401	-1.83569	0.0075	0.0340183	NCSTN
hsa-miR-125a-5p	1	353	0.283286	-1.91621	0.0075	0.0340183	MBD6
hsa-miR-210	1	368	0.271739	-1.97803	0.0075	0.0340183	C17orf57
hsa-miR-1297	1	418	0.239234	-2.17461	0.0075	0.0340183	C17orf57
hsa-miR-499-5p	1	418	0.239234	-2.17461	0.0075	0.0340183	C17orf57
hsa-miR-296	1	449	0.222717	-2.29022	0.0075	0.0340183	NCSTN
hsa-miR-496	1	451	0.221729	-2.29753	0.0075	0.0340183	C17orf57
hsa-miR-564	1	460	0.217391	-2.33024	0.0075	0.0340183	NCSTN
hsa-miR-432	1	473	0.211416	-2.37692	0.0075	0.0340183	SLC16A5
hsa-miR-454	1	484	0.206612	-2.41593	0.0075	0.0340183	MLL5
hsa-miR-202	1	490	0.204082	-2.43702	0.0075	0.0340183	C17orf57
hsa-miR-194	1	497	0.201207	-2.46146	0.0075	0.0340183	C17orf57
hsa-miR-155	1	502	0.199203	-2.47882	0.0075	0.0340183	LRBA
hsa-miR-301b	1	502	0.199203	-2.47882	0.0075	0.0340183	MLL5
hsa-miR-301a	1	504	0.198413	-2.48574	0.0075	0.0340183	MLL5
hsa-miR-376b	1	517	0.193424	-2.53039	0.0075	0.0340183	LRBA
hsa-miR-26a	1	536	0.186567	-2.59471	0.0075	0.0340183	C17orf57
hsa-miR-448	1	560	0.178571	-2.67445	0.0075	0.0340183	C17orf57
hsa-miR-217	1	582	0.171821	-2.74618	0.0075	0.0340183	C17orf57
hsa-miR-224	1	588	0.170068	-2.76553	0.0075	0.0340183	C17orf57
hsa-miR-17	1	617	0.162075	-2.85787	0.0075	0.0340183	MLL5
hsa-miR-30a	1	625	0.16	-2.883	0.0075	0.0340183	C17orf57
hsa-miR-519d	1	641	0.156006	-2.93287	0.0075	0.0340183	NCSTN
hsa-miR-129-5p	1	697	0.143472	-3.1035	0.0075	0.0340183	SLC16A5
hsa-miR-20b	1	710	0.140845	-3.14232	0.0075	0.0340183	MLL5
hsa-miR-20a	1	715	0.13986	-3.15717	0.0075	0.0340183	MLL5
hsa-miR-326	1	809	0.123609	-3.4296	0.0075	0.0340183	NCSTN
hsa-miR-548a-3p	1	119	0.840336	-0.581589	0.008	0.0340183	SIRT5
hsa-let-7d*	1	121	0.826446	-0.599348	0.008	0.0340183	SIRT5
hsa-miR-28-3p	1	122	0.819672	-0.608136	0.008	0.0340183	SIRT5
hsa-miR-891a	1	122	0.819672	-0.608136	0.008	0.0340183	SIRT5
hsa-let-7b*	1	127	0.787402	-0.651202	0.008	0.0340183	SIRT5
hsa-miR-556-3p	1	136	0.735294	-0.725341	0.008	0.0340183	SIRT5
hsa-miR-514	1	174	0.574713	-1.00126	0.008	0.0340183	SIRT5
hsa-miR-188	1	253	0.395257	-1.4573	0.008	0.0340183	POMGNT1
hsa-miR-525	1	323	0.309598	-1.78785	0.008	0.0340183	POMGNT1
hsa-miR-345	1	360	0.277778	-1.94524	0.008	0.0340183	SIRT5
hsa-miR-154	1	415	0.240964	-2.16319	0.008	0.0340183	UBXN2A
hsa-miR-320a	1	521	0.191939	-2.54403	0.008	0.0340183	SIRT5
hsa-miR-320b	1	521	0.191939	-2.54403	0.008	0.0340183	SIRT5
hsa-miR-206	1	545	0.183486	-2.6248	0.008	0.0340183	SIRT5
hsa-miR-218	1	582	0.171821	-2.74618	0.008	0.0340183	RPAP2
hsa-miR-132	1	601	0.166389	-2.80716	0.008	0.0340183	SIRT5
hsa-miR-212	1	613	0.163132	-2.84524	0.008	0.0340183	SIRT5
hsa-miR-30c	1	637	0.156986	-2.92046	0.008	0.0340183	PDIA5
hsa-miR-136	1	668	0.149701	-3.01587	0.008	0.0340183	ABCA7
hsa-miR-195	1	700	0.142857	-3.11248	0.008	0.0340183	SIRT5
hsa-miR-16	1	713	0.140252	-3.15123	0.008	0.0340183	SIRT5
hsa-miR-107	1	747	0.133869	-3.25132	0.008	0.0340183	SIRT5
hsa-miR-186	1	889	0.112486	-3.65284	0.008	0.0340183	SIRT5
hsa-miR-130b*	1	76	1.31579	-0.117359	0.0085	0.0340183	RNF5
hsa-miR-629*	1	81	1.23457	-0.182209	0.0085	0.0340183	RNF5
hsa-miR-31*	1	88	1.13636	-0.266952	0.0085	0.0340183	RNF5
hsa-miR-551b*	1	89	1.1236	-0.278546	0.0085	0.0340183	RNF5
hsa-miR-942	1	110	0.909091	-0.498416	0.0085	0.0340183	RNF5
hsa-let-7c*	1	114	0.877193	-0.536068	0.0085	0.0340183	RNF5
hsa-miR-921	1	114	0.877193	-0.536068	0.0085	0.0340183	RNF5
hsa-miR-29a*	1	118	0.847458	-0.572616	0.0085	0.0340183	RNF5
hsa-miR-491-3p	1	121	0.826446	-0.599348	0.0085	0.0340183	RNF5
hsa-miR-483-3p	1	123	0.813008	-0.616865	0.0085	0.0340183	RNF5
hsa-miR-933	1	124	0.806452	-0.625535	0.0085	0.0340183	RNF5
hsa-miR-877	1	127	0.787402	-0.651202	0.0085	0.0340183	RNF5
hsa-miR-922	1	129	0.775194	-0.668038	0.0085	0.0340183	RNF5
hsa-miR-923	1	134	0.746269	-0.709217	0.0085	0.0340183	RNF5
hsa-miR-202*	1	145	0.689655	-0.795639	0.0085	0.0340183	RNF5
hsa-miR-501-5p	1	145	0.689655	-0.795639	0.0085	0.0340183	RNF5
hsa-miR-525-3p	1	152	0.657895	-0.847976	0.0085	0.0340183	RNF5
hsa-miR-654-5p	1	157	0.636943	-0.884226	0.0085	0.0340183	RNF5
hsa-miR-524-3p	1	160	0.625	-0.905553	0.0085	0.0340183	RNF5
hsa-let-7g*	1	161	0.621118	-0.912595	0.0085	0.0340183	RNF5
hsa-miR-409-3p	1	171	0.584795	-0.981252	0.0085	0.0340183	RNF5
hsa-miR-200a*	1	176	0.568182	-1.01446	0.0085	0.0340183	NCBP1
hsa-miR-518e	1	244	0.409836	-1.41077	0.0085	0.0340183	RNF5
hsa-miR-627	1	249	0.401606	-1.43676	0.0085	0.0340183	RNF5
hsa-miR-644	1	322	0.310559	-1.78346	0.0085	0.0340183	UTRN
hsa-miR-601	1	359	0.278552	-1.94111	0.0085	0.0340183	RNF5
hsa-miR-766	1	524	0.19084	-2.55422	0.0085	0.0340183	UTRN
hsa-miR-19b	1	573	0.17452	-2.71699	0.0085	0.0340183	MBD2
hsa-miR-19a	1	593	0.168634	-2.78159	0.0085	0.0340183	MBD2
hsa-miR-503	1	618	0.161812	-2.86102	0.0085	0.0340183	MYO19
hsa-miR-543	1	668	0.149701	-3.01587	0.0085	0.0340183	MBD2
hsa-miR-151	1	113	0.884956	-0.526762	0.009	0.0340183	SUGP1
hsa-miR-520a	1	140	0.714286	-0.757028	0.009	0.0340183	HECTD1
hsa-miR-182*	1	190	0.526316	-1.10391	0.009	0.0340183	BSCL2
hsa-miR-585	1	216	0.462963	-1.25824	0.009	0.0340183	SUGP1
hsa-miR-626	1	219	0.456621	-1.2752	0.009	0.0340183	HECTD1
hsa-miR-519e*	1	261	0.383142	-1.49778	0.009	0.0340183	HECTD1
hsa-miR-515-5p	1	281	0.355872	-1.59561	0.009	0.0340183	HECTD1
hsa-miR-502	1	283	0.353357	-1.60515	0.009	0.0340183	SUGP1
hsa-miR-483	1	343	0.291545	-1.87415	0.009	0.0340183	BSCL2
hsa-miR-636	1	368	0.271739	-1.97803	0.009	0.0340183	HECTD1
hsa-miR-551a	1	372	0.268817	-1.99428	0.009	0.0340183	SUGP1
hsa-miR-412	1	395	0.253165	-2.08587	0.009	0.0340183	UBR4
hsa-miR-588	1	425	0.235294	-2.2011	0.009	0.0340183	BSCL2
hsa-miR-635	1	429	0.2331	-2.21613	0.009	0.0340183	SUGP1
hsa-miR-484	1	477	0.209644	-2.39116	0.009	0.0340183	BSCL2
hsa-miR-193b	1	668	0.149701	-3.01587	0.009	0.0340183	BSCL2
hsa-miR-142-3p	1	401	0.249377	-2.10929	0.0095	0.0357443	ANKAR
hsa-miR-146a	1	542	0.184502	-2.6148	0.01	0.0372851	MLL5
hsa-miR-346	1	668	0.149701	-3.01587	0.01	0.0372851	TUBGCP2
hsa-miR-22*	1	119	0.840336	-0.581589	0.0105	0.0376174	CCDC18
hsa-miR-628-5p	1	130	0.769231	-0.676376	0.0105	0.0376174	CCDC18
hsa-miR-556-5p	1	137	0.729927	-0.733332	0.0105	0.0376174	CCDC18
hsa-miR-376a*	1	138	0.724638	-0.741276	0.0105	0.0376174	CCDC18
hsa-miR-28	1	249	0.401606	-1.43676	0.0105	0.0376174	CCDC18
hsa-miR-199a	1	263	0.380228	-1.50777	0.0105	0.0376174	CCDC18
hsa-miR-199a-5p	2	475	0.421053	-1.9878	0.0105	0.0376174	NUP214, PLIN5
hsa-miR-671	1	510	0.196078	-2.50641	0.0105	0.0376174	CCDC18
hsa-miR-133b	1	689	0.145138	-3.07948	0.0105	0.0376174	CCDC18
hsa-miR-452	2	276	0.724638	-1.06083	0.011	0.039083	MINA, RPS6KA3
hsa-miR-130a*	1	108	0.925926	-0.479148	0.0115	0.039083	TRIM14
hsa-miR-380-5p	2	122	1.63934	0.149989	0.0115	0.039083	EDC4, NCSTN
hsa-miR-579	1	166	0.60241	-0.947312	0.0115	0.039083	TRIM14
hsa-miR-661	2	634	0.315457	-2.56312	0.0115	0.039083	INPP4A, NCSTN
hsa-miR-27b*	1	108	0.925926	-0.479148	0.012	0.039083	ZNF493
hsa-miR-943	1	123	0.813008	-0.616865	0.012	0.039083	ZNF493
hsa-miR-665	1	135	0.740741	-0.717303	0.012	0.039083	ZNF493
hsa-miR-655	1	140	0.714286	-0.757028	0.012	0.039083	ZNF493
hsa-miR-549	1	189	0.529101	-1.09768	0.012	0.039083	ZNF493
hsa-miR-563	2	196	1.02041	-0.538873	0.012	0.039083	NCSTN, RELL1
hsa-miR-208b	2	236	0.847458	-0.818012	0.012	0.039083	CUL5, DLEU1
hsa-miR-362-3p	1	371	0.269542	-1.99023	0.012	0.039083	ZNF493
hsa-miR-622	2	397	0.503778	-1.66329	0.012	0.039083	EDC4, MINA
hsa-miR-10b	1	418	0.239234	-2.17461	0.012	0.039083	ZNF493
hsa-miR-590-5p	1	436	0.229358	-2.24226	0.012	0.039083	ZNF493
hsa-miR-329	1	478	0.209205	-2.39471	0.012	0.039083	ZNF493
hsa-miR-449a	1	514	0.194553	-2.52014	0.012	0.039083	ZNF493
hsa-miR-211	2	706	0.283286	-2.7984	0.012	0.039083	CCDC84, C1orf84
hsa-miR-449b	1	770	0.12987	-3.31805	0.012	0.039083	ZNF493
hsa-miR-34a	1	779	0.12837	-3.34397	0.012	0.039083	ZNF493
hsa-miR-495	1	796	0.125628	-3.39263	0.012	0.039083	ZNF493
hsa-miR-203	1	802	0.124688	-3.40972	0.012	0.039083	ZNF493
hsa-let-7e*	1	134	0.746269	-0.709217	0.0125	0.0396154	UBR4
hsa-miR-555	2	219	0.913242	-0.704646	0.0125	0.0396154	MINA, RELL1
hsa-miR-511	2	267	0.749064	-1.00874	0.0125	0.0396154	NCSTN, C2CD3
hsa-miR-491-5p	2	421	0.475059	-1.76713	0.0125	0.0396154	RELL1, POFUT2
hsa-miR-18a*	1	438	0.228311	-2.24969	0.0125	0.0396154	UBR4
hsa-miR-200a	2	596	0.33557	-2.43354	0.0125	0.0396154	C9orf85, C1orf84
hsa-miR-141	2	614	0.325733	-2.49544	0.0125	0.0396154	C9orf85, C1orf84
hsa-miR-337-3p	1	113	0.884956	-0.526762	0.013	0.0399701	ANKRD36
hsa-miR-450a	2	246	0.813008	-0.881614	0.013	0.0399701	C9orf85, C17orf57
hsa-miR-519a	2	268	0.746269	-1.01459	0.013	0.0399701	C2CD3, RELL1
hsa-miR-411	2	355	0.56338	-1.47106	0.013	0.0399701	NCSTN, POFUT2
hsa-miR-510	2	441	0.453515	-1.85081	0.013	0.0399701	UBR1, RELL1
hsa-miR-384	2	453	0.441501	-1.89988	0.013	0.0399701	NPHP3, C11orf73
hsa-miR-372	2	654	0.30581	-2.62974	0.013	0.0399701	PNPLA6, C1orf84
hsa-miR-378	2	713	0.280505	-2.82065	0.013	0.0399701	MLL5, MINA
hsa-miR-299-5p	2	179	1.11732	-0.405124	0.0135	0.0404509	EDC4, RELL1
hsa-miR-17-3p	2	236	0.847458	-0.818012	0.0135	0.0404509	NCSTN, C2CD3
hsa-miR-639	2	444	0.45045	-1.86315	0.0135	0.0404509	DHX35, NCSTN
hsa-miR-638	2	507	0.394477	-2.11144	0.0135	0.0404509	EDC4, NPHP3
hsa-miR-22	2	646	0.309598	-2.60322	0.0135	0.0404509	SIRT5, MINA
hsa-miR-103	2	726	0.275482	-2.8617	0.0135	0.0404509	SIRT5, MINA
hsa-miR-15b	2	764	0.26178	-2.97981	0.0135	0.0404509	C20orf24, SIRT5
hsa-miR-380*	2	95	2.10526	0.511458	0.014	0.0409272	RELL1, C1orf84
hsa-miR-421	2	588	0.340136	-2.40571	0.014	0.0409272	PPIE, RNF5
hsa-miR-183*	2	85	2.35294	0.674001	0.0145	0.0409272	C17orf57, ZNRD1-AS1
hsa-miR-509-5p	2	99	2.0202	0.451557	0.0145	0.0409272	C17orf57, RELL1
hsa-miR-509-3-5p	2	100	2	0.436985	0.0145	0.0409272	C17orf57, RELL1
hsa-miR-193a-3p	2	330	0.606061	-1.3491	0.0145	0.0409272	C9orf85, BSCL2
hsa-miR-219-5p	2	364	0.549451	-1.5135	0.0145	0.0409272	C17orf57, RELL1
hsa-miR-302e	2	396	0.505051	-1.65887	0.0145	0.0409272	MLL5, C1orf84
hsa-miR-153	2	446	0.44843	-1.87135	0.0145	0.0409272	C17orf57, RELL1
hsa-miR-520a-3p	2	509	0.392927	-2.11902	0.0145	0.0409272	MLL5, C1orf84
hsa-miR-520c-3p	2	529	0.378072	-2.19382	0.0145	0.0409272	MLL5, C1orf84
hsa-miR-876-5p	2	537	0.372439	-2.2233	0.0145	0.0409272	C17orf57, CR1
hsa-miR-520d-3p	2	539	0.371058	-2.23063	0.0145	0.0409272	MLL5, C1orf84
hsa-miR-506	2	625	0.32	-2.5328	0.0145	0.0409272	NCSTN, C17orf57
hsa-miR-302b	2	631	0.316957	-2.55304	0.0145	0.0409272	MLL5, C1orf84
hsa-miR-302d	2	644	0.310559	-2.59656	0.0145	0.0409272	MLL5, C1orf84
hsa-miR-367*	2	84	2.38095	0.691397	0.015	0.0409272	SIRT5, ZNRD1-AS1
hsa-miR-548d-5p	2	138	1.44928	-0.0274854	0.015	0.0409272	SLC16A5, C17orf57
hsa-miR-548c-5p	2	144	1.38889	-0.0888838	0.015	0.0409272	SLC16A5, C17orf57
hsa-miR-548a-5p	2	145	1.37931	-0.0988767	0.015	0.0409272	SLC16A5, C17orf57
hsa-miR-487b	2	194	1.03093	-0.52368	0.015	0.0409272	POMGNT1, DPY19L3
hsa-miR-338-3p	2	513	0.389864	-2.13411	0.015	0.0409272	SIRT5, RELL1
hsa-miR-183	2	576	0.347222	-2.36359	0.015	0.0409272	INPP4A, MBD2
hsa-miR-520e	2	613	0.326264	-2.49202	0.015	0.0409272	SIRT5, C1orf84
hsa-miR-181a	2	683	0.292826	-2.72456	0.015	0.0409272	SIRT5, C1orf84
hsa-miR-27a	2	722	0.277008	-2.8491	0.015	0.0409272	MBD2, SMYD5
hsa-miR-181b	2	747	0.267738	-2.9273	0.015	0.0409272	SIRT5, C1orf84
hsa-let-7a*	2	140	1.42857	-0.0482333	0.0155	0.0412	SIRT5, C17orf57
hsa-miR-598	2	176	1.13636	-0.380357	0.0155	0.0412	TRMU, MINA
hsa-miR-641	2	226	0.884956	-0.752177	0.0155	0.0412	RNF5, ZNRD1-AS1
hsa-miR-296-3p	2	439	0.455581	-1.84255	0.0155	0.0412	SIRT5, C17orf57
hsa-miR-565	2	491	0.407332	-2.05022	0.0155	0.0412	INPP4A, C1orf228
hsa-miR-433	2	511	0.391389	-2.12657	0.0155	0.0412	SIRT5, C17orf57
hsa-miR-612	2	662	0.302115	-2.6561	0.0155	0.0412	INPP4A, BSCL2
hsa-miR-9	2	730	0.273973	-2.87426	0.0155	0.0412	SIRT5, LRBA
hsa-miR-323-3p	2	108	1.85185	0.325665	0.016	0.041854	C17orf57, RNF5
hsa-miR-615-5p	2	208	0.961538	-0.627316	0.016	0.041854	C17orf57, RNF5
hsa-miR-617	2	311	0.643087	-1.25193	0.016	0.041854	SUGP1, NPHP3
hsa-miR-767-3p	2	369	0.542005	-1.53677	0.016	0.041854	MACF1, C2CD3
hsa-miR-196b	2	515	0.38835	-2.14163	0.016	0.041854	C17orf57, RNF5
hsa-miR-877*	2	100	2	0.436985	0.0165	0.0424875	BSCL2, RNF5
hsa-miR-375	2	381	0.524934	-1.59175	0.0165	0.0424875	TUBGCP2, PKP4
hsa-miR-143	2	600	0.333333	-2.44738	0.0165	0.0424875	SIRT5, C2CD3
hsa-miR-30b	2	641	0.312012	-2.58656	0.0165	0.0424875	PDIA5, MBD2
hsa-miR-214	2	953	0.209864	-3.53426	0.0165	0.0424875	POMGNT1, RNF5
hsa-miR-505	2	509	0.392927	-2.11902	0.017	0.0436386	CLASRP, SLC16A5
hsa-miR-618	2	145	1.37931	-0.0988767	0.0175	0.0442331	MINA, ZNF493
hsa-miR-325	2	234	0.854701	-0.805031	0.0175	0.0442331	UBR4, C17orf57
hsa-miR-339-5p	2	355	0.56338	-1.47106	0.0175	0.0442331	ABCA7, NUP205
hsa-miR-146b-5p	2	465	0.430108	-1.94815	0.0175	0.0442331	MLL5, C17orf57
hsa-miR-768-5p	2	509	0.392927	-2.11902	0.0175	0.0442331	UBR4, RNF5
hsa-miR-222	2	452	0.442478	-1.89582	0.018	0.0452195	TFAM, ANKRD36
hsa-miR-31	3	517	0.580271	-1.76788	0.018	0.0452195	PPP1R12B, UBR4, RNF5
hsa-miR-654-3p	2	112	1.78571	0.273192	0.0185	0.0457778	TRIM14, C1orf84
hsa-miR-1271	2	310	0.645161	-1.2467	0.0185	0.0457778	INPP4A, ZNF493
hsa-miR-647	3	443	0.677201	-1.44991	0.0185	0.0457778	EDC4, INPP4A, C2CD3
hsa-miR-96	2	545	0.366972	-2.25252	0.0185	0.0457778	INPP4A, ZNF493
hsa-miR-370	2	786	0.254453	-3.04701	0.0185	0.0457778	SUGP1, NUP205
hsa-miR-624*	2	104	1.92308	0.380201	0.019	0.0457778	ZNF493, C1orf84
hsa-miR-488*	2	106	1.88679	0.352664	0.019	0.0457778	TRIM14, SLC16A5
hsa-miR-578	2	198	1.0101	-0.553932	0.019	0.0457778	INPP4A, UBR4
hsa-miR-99a	3	236	1.27119	-0.267585	0.019	0.0457778	MINA, DLEU1, RELL1
hsa-miR-34c-5p	2	527	0.379507	-2.18642	0.019	0.0457778	ZNF493, C1orf84
hsa-miR-324-5p	2	626	0.319489	-2.53618	0.019	0.0457778	ZNF493, ZNRD1-AS1
hsa-miR-185	3	713	0.420757	-2.49006	0.019	0.0457778	EDC4, C2CD3, ACAD11
hsa-miR-15a	3	737	0.407056	-2.57027	0.019	0.0457778	C20orf24, SIRT5, MINA
hsa-miR-93	2	762	0.262467	-2.97366	0.019	0.0457778	MLL5, ZNF493
hsa-miR-497*	2	106	1.88679	0.352664	0.0195	0.0460401	C17orf57, ZNF493
hsa-miR-135b	3	558	0.537634	-1.93116	0.0195	0.0460401	FAH, CUL5, C1orf84
hsa-miR-144	2	590	0.338983	-2.41269	0.0195	0.0460401	C17orf57, ZNF493
hsa-miR-410	2	657	0.304414	-2.63964	0.0195	0.0460401	C17orf57, ZNF493
hsa-miR-637	3	697	0.430416	-2.43579	0.0195	0.0460401	ZRANB2, NCSTN, MINA
hsa-miR-374b	2	703	0.284495	-2.78884	0.0195	0.0460401	C17orf57, ZNF493
hsa-miR-374a	2	736	0.271739	-2.89304	0.0195	0.0460401	C17orf57, ZNF493
hsa-miR-208a	3	138	2.17391	0.686306	0.02	0.0462921	SIRT5, CUL5, DLEU1
hsa-miR-548d-3p	2	143	1.3986	-0.078824	0.02	0.0462921	SIRT5, ZNF493
hsa-miR-620	3	163	1.84049	0.38977	0.02	0.0462921	NCSTN, RELL1, RNF5
hsa-miR-425	2	423	0.472813	-1.77561	0.02	0.0462921	C1orf112, CD40
hsa-miR-361-5p	3	434	0.691244	-1.40878	0.02	0.0462921	SIRT5, C18orf8, STK38L
hsa-miR-10a	2	464	0.431034	-1.94416	0.02	0.0462921	SIRT5, ZNF493
hsa-miR-204	3	684	0.438596	-2.3912	0.02	0.0462921	DNAJC10, CCDC84, C1orf84
hsa-miR-125b	3	601	0.499168	-2.09449	0.0205	0.0469222	NCSTN, MBD6, MINA
hsa-miR-300	3	625	0.48	-2.1826	0.0205	0.0469222	MBD2, MINA, DLEU1
hsa-miR-381	3	655	0.458015	-2.29	0.0205	0.0469222	MBD2, MINA, DLEU1
hsa-miR-497	3	777	0.3861	-2.70101	0.0205	0.0469222	SIRT5, MINA, RELL1
hsa-miR-21	2	413	0.484262	-1.73295	0.021	0.0478011	ZNF493, CCT6P3
hsa-miR-181c	3	659	0.455235	-2.3041	0.021	0.0478011	SIRT5, UBR4, C1orf84
hsa-miR-431	3	569	0.527241	-1.97366	0.0215	0.0488044	SIRT5, PKP4, SPATA5L1
hsa-miR-24	3	795	0.377358	-2.75875	0.022	0.0498022	NCSTN, SLC16A5, C17orf57

## Sheet: S5D
Table S5D
Enrichment of miRNA binding sites in PD leukocyte detected junctions post-DBS on electrical stimulation (by linear regression analysis) compared to pre-DBS
microRNA-Name	Number Changed	Number Measured	Percent Changed	Zscore	PermuteP	AdjP	Changed GeneSymbols
hsa-miR-376c	1	18	5.55556	3.44236	0.0015	0.3015	ITGAL
hsa-miR-376b	1	21	4.7619	3.15412	0.0015	0.3015	ITGAL
hsa-miR-376a	1	23	4.34783	2.99282	0.0015	0.3015	ITGAL
hsa-miR-544	1	24	4.16667	2.91948	0.0015	0.3015	ITGAL
hsa-miR-150	1	30	3.33333	2.55547	0.0045	0.7236	FGD4

## Sheet: S5E
Table S5E
Enrichment of miRNA binding sites in PD leukocyte detected exons post-DBS off electrical stimulation (by splicing-index analysis) compared to post-DBS on stimulation satte (1 hour earlier)
microRNA-Name	Number Changed	Number Measured	Percent Changed	Zscore	PermuteP	AdjP	Changed GeneSymbols
hsa-miR-101*	1	91	1.0989	0.285027	0.001	0.0193125	GTF2H4
hsa-miR-937	1	143	0.699301	-0.174185	0.001	0.0193125	GTF2H4
hsa-miR-518d-3p	1	149	0.671141	-0.216257	0.001	0.0193125	GTF2H4
hsa-miR-574	1	149	0.671141	-0.216257	0.001	0.0193125	GTF2H4
hsa-miR-302a*	1	157	0.636943	-0.269995	0.001	0.0193125	GTF2H4
hsa-miR-486	1	219	0.456621	-0.620203	0.001	0.0193125	GTF2H4
hsa-miR-518f	1	251	0.398406	-0.769651	0.001	0.0193125	GTF2H4
hsa-miR-215	1	290	0.344828	-0.933174	0.001	0.0193125	CCDC62
hsa-miR-192	1	309	0.323625	-1.00703	0.001	0.0193125	CCDC62
hsa-miR-371	1	314	0.318471	-1.02593	0.001	0.0193125	GTF2H4
hsa-miR-125a	1	320	0.3125	-1.04833	0.001	0.0193125	GTF2H4
hsa-miR-554	1	332	0.301205	-1.09227	0.001	0.0193125	GTF2H4
hsa-miR-452*	1	334	0.299401	-1.09948	0.001	0.0193125	GTF2H4
hsa-miR-615	1	360	0.277778	-1.19073	0.001	0.0193125	GTF2H4
hsa-miR-652	1	371	0.269542	-1.22801	0.001	0.0193125	GTF2H4
hsa-miR-770-5p	1	380	0.263158	-1.25798	0.001	0.0193125	GTF2H4
hsa-miR-560	1	388	0.257732	-1.28423	0.001	0.0193125	GTF2H4
hsa-miR-619	1	389	0.257069	-1.28749	0.001	0.0193125	GTF2H4
hsa-miR-412	1	395	0.253165	-1.30692	0.001	0.0193125	GTF2H4
hsa-miR-622	1	397	0.251889	-1.31335	0.001	0.0193125	GTF2H4
hsa-miR-596	1	510	0.196078	-1.64895	0.001	0.0193125	GTF2H4
hsa-miR-671	1	510	0.196078	-1.64895	0.001	0.0193125	GTF2H4
hsa-miR-148a	1	608	0.164474	-1.90723	0.001	0.0193125	CCDC62
hsa-miR-148b	1	613	0.163132	-1.9198	0.001	0.0193125	CCDC62
hsa-miR-212	1	613	0.163132	-1.9198	0.001	0.0193125	GTF2H4
hsa-miR-381	1	655	0.152672	-2.02348	0.001	0.0193125	GTF2H4
hsa-miR-346	1	668	0.149701	-2.05491	0.001	0.0193125	GTF2H4
hsa-miR-133a	1	712	0.140449	-2.15925	0.001	0.0193125	GTF2H4
hsa-miR-149	1	837	0.119474	-2.44125	0.001	0.0193125	GTF2H4
hsa-miR-556	1	50	2	0.915785	0.0015	0.0193125	WDR3
hsa-miR-139	1	103	0.970874	0.15909	0.0015	0.0193125	WDR3
hsa-miR-549	1	189	0.529101	-0.463085	0.0015	0.0193125	WDR3
hsa-miR-624	1	205	0.487805	-0.549259	0.0015	0.0193125	WDR3
hsa-miR-626	1	219	0.456621	-0.620203	0.0015	0.0193125	WDR3
hsa-miR-199a-5p	1	475	0.210526	-1.55018	0.0015	0.0193125	FUT8
hsa-miR-199b-5p	1	492	0.203252	-1.59865	0.0015	0.0193125	FUT8
hsa-miR-448	1	560	0.178571	-1.78373	0.0015	0.0193125	WDR3
hsa-miR-324-3p	1	561	0.178253	-1.78635	0.0015	0.0193125	WDR3
hsa-miR-379	1	347	0.288184	-1.14568	0.002	0.0193125	AC091565.1
hsa-miR-134	1	582	0.171821	-1.84098	0.002	0.0193125	TCEB2
hsa-miR-628	1	57	1.75439	0.773002	0.0025	0.0193125	MED23
hsa-miR-541*	1	89	1.1236	0.3077	0.0025	0.0193125	MED23
hsa-miR-551b*	1	89	1.1236	0.3077	0.0025	0.0193125	MED23
hsa-miR-302d*	1	94	1.06383	0.251986	0.0025	0.0193125	MED23
hsa-miR-19b-2*	1	101	0.990099	0.178988	0.0025	0.0193125	MED23
hsa-miR-628-3p	1	104	0.961538	0.149289	0.0025	0.0193125	MED23
hsa-miR-606	1	110	0.909091	0.0924217	0.0025	0.0193125	MED23
hsa-miR-361-3p	1	111	0.900901	0.0832492	0.0025	0.0193125	MED23
hsa-miR-672	1	116	0.862069	0.0385909	0.0025	0.0193125	MED23
hsa-miR-219-1-3p	1	120	0.833333	0.00421724	0.0025	0.0193125	MED23
hsa-miR-302b*	1	130	0.769231	-0.0770493	0.0025	0.0193125	MED23
hsa-miR-574-5p	1	142	0.704225	-0.167014	0.0025	0.0193125	MED23
hsa-miR-618	1	145	0.689655	-0.188387	0.0025	0.0193125	MED23
hsa-miR-502-5p	1	150	0.666667	-0.223116	0.0025	0.0193125	MED23
hsa-miR-516a-3p	1	181	0.552486	-0.417657	0.0025	0.0193125	MED23
hsa-miR-523	1	223	0.44843	-0.639795	0.0025	0.0193125	MED23
hsa-miR-641	1	226	0.442478	-0.654305	0.0025	0.0193125	MED23
hsa-miR-600	1	228	0.438596	-0.663893	0.0025	0.0193125	MED23
hsa-miR-518c	1	244	0.409836	-0.738294	0.0025	0.0193125	MED23
hsa-miR-122a	1	253	0.395257	-0.778486	0.0025	0.0193125	MED23
hsa-miR-191	1	258	0.387597	-0.800343	0.0025	0.0193125	MED23
hsa-miR-583	1	261	0.383142	-0.813303	0.0025	0.0193125	MED23
hsa-miR-338	1	270	0.37037	-0.851521	0.0025	0.0193125	MED23
hsa-miR-516-3p	1	278	0.359712	-0.8847	0.0025	0.0193125	MED23
hsa-miR-520f	1	280	0.357143	-0.892884	0.0025	0.0193125	MED23
hsa-miR-621	1	286	0.34965	-0.917182	0.0025	0.0193125	MED23
hsa-miR-605	1	303	0.330033	-0.98407	0.0025	0.0193125	MED23
hsa-miR-423	2	304	0.657895	-0.339177	0.0025	0.0193125	WDR3, GTF2H4
hsa-miR-617	1	311	0.321543	-1.01462	0.0025	0.0193125	MED23
hsa-miR-122	1	337	0.296736	-1.11025	0.0025	0.0193125	MED23
hsa-miR-449	1	355	0.28169	-1.17353	0.0025	0.0193125	MED23
hsa-miR-611	2	407	0.4914	-0.779433	0.0025	0.0193125	WDR3, GTF2H4
hsa-miR-657	1	409	0.244499	-1.35154	0.0025	0.0193125	MED23
hsa-miR-635	1	429	0.2331	-1.41366	0.0025	0.0193125	MED23
hsa-miR-331	1	452	0.221239	-1.48296	0.0025	0.0193125	MED23
hsa-miR-769-3p	1	460	0.217391	-1.50656	0.0025	0.0193125	MED23
hsa-miR-518c*	1	471	0.212314	-1.53863	0.0025	0.0193125	MED23
hsa-miR-654	1	496	0.201613	-1.60992	0.0025	0.0193125	PTCH1
hsa-miR-33a	1	525	0.190476	-1.69011	0.0025	0.0193125	AIFM1
hsa-miR-876-5p	1	537	0.18622	-1.72258	0.0025	0.0193125	MED23
hsa-miR-504	1	565	0.176991	-1.79684	0.0025	0.0193125	MED23
hsa-miR-33b	1	578	0.17301	-1.83066	0.0025	0.0193125	AIFM1
hsa-miR-125b	2	601	0.332779	-1.41568	0.0025	0.0193125	WDR3, GTF2H4
hsa-miR-661	1	634	0.157729	-1.97206	0.0025	0.0193125	MED23
hsa-miR-488	1	661	0.151286	-2.03802	0.0025	0.0193125	MED23
hsa-miR-612	1	662	0.151057	-2.04044	0.0025	0.0193125	MED23
hsa-miR-378	2	713	0.280505	-1.72197	0.0025	0.0193125	TOM1L1, GTF2H4
hsa-miR-495	1	796	0.125628	-2.35081	0.0025	0.0193125	MED23
hsa-miR-326	1	809	0.123609	-2.37968	0.0025	0.0193125	MED23
hsa-miR-29a*	1	118	0.847458	0.0212605	0.003	0.0193125	LRRC1
hsa-miR-30c-2*	1	143	0.699301	-0.174185	0.003	0.0193125	STARD5
hsa-miR-885-3p	1	175	0.571429	-0.382435	0.003	0.0193125	STARD5
hsa-miR-519e*	1	261	0.383142	-0.813303	0.003	0.0193125	NPHP3
hsa-miR-515-5p	1	281	0.355872	-0.89696	0.003	0.0193125	NPHP3
hsa-miR-614	2	291	0.687285	-0.274823	0.003	0.0193125	MED23, GTF2H4
hsa-miR-644	1	322	0.310559	-1.05573	0.003	0.0193125	MDN1
hsa-miR-551b	1	331	0.302115	-1.08865	0.003	0.0193125	NPHP3
hsa-miR-500	2	364	0.549451	-0.608368	0.003	0.0193125	MED23, GTF2H4
hsa-miR-342-3p	1	382	0.26178	-1.26457	0.003	0.0193125	SP140
hsa-miR-361-5p	1	434	0.230415	-1.42892	0.003	0.0193125	TYW1
hsa-miR-155	1	502	0.199203	-1.62672	0.003	0.0193125	NPHP3
hsa-miR-542-3p	1	502	0.199203	-1.62672	0.003	0.0193125	SP140
hsa-miR-766	2	524	0.381679	-1.18347	0.003	0.0193125	MED23, GTF2H4
hsa-miR-183	1	576	0.173611	-1.82548	0.003	0.0193125	TYW1
hsa-miR-125a-3p	1	591	0.169205	-1.86408	0.003	0.0193125	MYL5
hsa-miR-7	1	626	0.159744	-1.95225	0.003	0.0193125	SP140
hsa-miR-150	1	644	0.15528	-1.99664	0.003	0.0193125	TAF4B
hsa-miR-494	1	717	0.13947	-2.17092	0.003	0.0193125	MYL5
hsa-miR-488*	1	106	0.943396	0.129972	0.0035	0.0193125	TRIM14
hsa-miR-130a*	1	108	0.925926	0.111021	0.0035	0.0193125	TRIM14
hsa-miR-654-3p	1	112	0.892857	0.0741591	0.0035	0.0193125	TRIM14
hsa-miR-135b*	1	120	0.833333	0.00421724	0.0035	0.0193125	NBPF10
hsa-miR-924	1	130	0.769231	-0.0770493	0.0035	0.0193125	NBPF10
hsa-miR-454-5p	1	162	0.617284	-0.302336	0.0035	0.0193125	RNFT1
hsa-miR-579	1	166	0.60241	-0.32757	0.0035	0.0193125	TRIM14
hsa-miR-487b	1	194	0.515464	-0.490652	0.0035	0.0193125	POMGNT1
hsa-miR-615-3p	1	208	0.480769	-0.564788	0.0035	0.0193125	NBPF10
hsa-miR-649	1	225	0.444444	-0.649486	0.0035	0.0193125	MDN1
hsa-miR-640	1	244	0.409836	-0.738294	0.0035	0.0193125	RNFT1
hsa-miR-627	1	249	0.401606	-0.760761	0.0035	0.0193125	NBPF10
hsa-miR-511	1	267	0.374532	-0.838889	0.0035	0.0193125	RNFT1
hsa-miR-498	1	280	0.357143	-0.892884	0.0035	0.0193125	NBPF10
hsa-miR-490-3p	1	317	0.315457	-1.03717	0.0035	0.0193125	NBPF10
hsa-miR-128b	1	319	0.31348	-1.04462	0.0035	0.0193125	RNFT1
hsa-miR-525	1	323	0.309598	-1.05942	0.0035	0.0193125	POMGNT1
hsa-miR-486-5p	1	327	0.30581	-1.0741	0.0035	0.0193125	UGT8
hsa-miR-411	1	355	0.28169	-1.17353	0.0035	0.0193125	NBPF10
hsa-miR-187	1	422	0.236967	-1.39213	0.0035	0.0193125	RNFT1
hsa-miR-599	1	456	0.219298	-1.49479	0.0035	0.0193125	TRIM14
hsa-miR-484	1	477	0.209644	-1.55593	0.0035	0.0193125	NBPF10
hsa-miR-335	2	481	0.4158	-1.04348	0.0035	0.0193125	MED23, CCDC62
hsa-miR-194	1	497	0.201207	-1.61273	0.0035	0.0193125	NBPF10
hsa-miR-18b	1	536	0.186567	-1.71989	0.0035	0.0193125	HECTD2
hsa-miR-29a	1	544	0.183824	-1.74134	0.0035	0.0193125	TARBP2
hsa-miR-873	1	565	0.176991	-1.79684	0.0035	0.0193125	HECTD2
hsa-miR-18a	1	566	0.176678	-1.79946	0.0035	0.0193125	HECTD2
hsa-miR-200b	1	580	0.172414	-1.83582	0.0035	0.0193125	UGT8
hsa-miR-429	1	607	0.164745	-1.9047	0.0035	0.0193125	UGT8
hsa-miR-30a	1	625	0.16	-1.94977	0.0035	0.0193125	NBPF10
hsa-miR-30d	1	629	0.158983	-1.95969	0.0035	0.0193125	NBPF10
hsa-miR-30c	1	637	0.156986	-1.97945	0.0035	0.0193125	NBPF10
hsa-miR-30e	1	637	0.156986	-1.97945	0.0035	0.0193125	NBPF10
hsa-miR-30b	1	641	0.156006	-1.98929	0.0035	0.0193125	NBPF10
hsa-miR-23b	1	727	0.137552	-2.19415	0.0035	0.0193125	TRIM14
hsa-miR-23a	1	733	0.136426	-2.20802	0.0035	0.0193125	TRIM14
hsa-miR-214	1	953	0.104932	-2.68848	0.0035	0.0193125	POMGNT1
hsa-miR-509-3p	1	161	0.621118	-0.29594	0.004	0.0193125	DNAJC17
hsa-miR-432*	1	266	0.37594	-0.834655	0.004	0.0193125	DNAJC17
hsa-miR-193a-3p	1	330	0.30303	-1.08502	0.004	0.0193125	VLDLR
hsa-miR-363*	1	346	0.289017	-1.14217	0.004	0.0193125	DNAJC17
hsa-miR-769-5p	2	358	0.558659	-0.583212	0.004	0.0193125	WDR3, MED23
hsa-miR-551a	2	372	0.537634	-0.641385	0.004	0.0193125	NPHP3, GTF2H4
hsa-miR-320	1	420	0.238095	-1.38594	0.004	0.0193125	DNAJC17
hsa-miR-371-5p	1	522	0.191571	-1.68193	0.004	0.0193125	PPRC1
hsa-miR-144	2	590	0.338983	-1.38375	0.004	0.0193125	CCDC62, TAF4B
hsa-miR-658	1	613	0.163132	-1.9198	0.004	0.0193125	DNAJC17
hsa-miR-503	1	618	0.161812	-1.93232	0.004	0.0193125	RPUSD3
hsa-miR-373	1	662	0.151057	-2.04044	0.004	0.0193125	DNAJC17
hsa-miR-9	1	730	0.136986	-2.20109	0.004	0.0193125	ADAM28
hsa-miR-148b*	2	89	2.24719	1.48477	0.0045	0.0193125	NBPF10, GTF2H4
hsa-miR-34b*	1	107	0.934579	0.120452	0.0045	0.0193125	PRSS21
hsa-miR-483-5p	1	123	0.813008	-0.0208327	0.0045	0.0193125	PRSS21
hsa-miR-556-3p	1	136	0.735294	-0.12297	0.0045	0.0193125	PRSS21
hsa-miR-146b-3p	1	149	0.671141	-0.216257	0.0045	0.0193125	PRSS21
hsa-miR-95	1	175	0.571429	-0.382435	0.0045	0.0193125	PRSS21
hsa-miR-555	1	219	0.456621	-0.620203	0.0045	0.0193125	NAB2
hsa-miR-124a	1	251	0.398406	-0.769651	0.0045	0.0193125	NAB2
hsa-miR-645	1	300	0.333333	-0.972466	0.0045	0.0193125	NAB2
hsa-miR-589	1	310	0.322581	-1.01083	0.0045	0.0193125	PRSS21
hsa-miR-668	1	342	0.292398	-1.12806	0.0045	0.0193125	NAB2
hsa-miR-632	1	347	0.288184	-1.14568	0.0045	0.0193125	NAB2
hsa-miR-375	1	381	0.262467	-1.26128	0.0045	0.0193125	NBEAL1
hsa-miR-642	1	402	0.248756	-1.32935	0.0045	0.0193125	NAB2
hsa-miR-34b	1	409	0.244499	-1.35154	0.0045	0.0193125	NAB2
hsa-miR-566	1	421	0.23753	-1.38903	0.0045	0.0193125	NAB2
hsa-miR-92a	1	448	0.223214	-1.47106	0.0045	0.0193125	HELB
hsa-miR-564	1	460	0.217391	-1.50656	0.0045	0.0193125	NAB2
hsa-miR-223	1	470	0.212766	-1.53573	0.0045	0.0193125	NAB2
hsa-miR-1	1	487	0.205339	-1.5845	0.0045	0.0193125	PRSS21
hsa-miR-202	1	490	0.204082	-1.593	0.0045	0.0193125	HELB
hsa-miR-613	1	496	0.201613	-1.60992	0.0045	0.0193125	PRSS21
hsa-miR-137	1	500	0.2	-1.62113	0.0045	0.0193125	PRSS21
hsa-miR-32	1	518	0.19305	-1.67099	0.0045	0.0193125	HELB
hsa-miR-363	1	524	0.19084	-1.68739	0.0045	0.0193125	HELB
hsa-miR-92b	1	529	0.189036	-1.70098	0.0045	0.0193125	HELB
hsa-miR-367	1	540	0.185185	-1.73063	0.0045	0.0193125	HELB
hsa-miR-206	1	545	0.183486	-1.744	0.0045	0.0193125	PRSS21
hsa-miR-25	1	559	0.178891	-1.7811	0.0045	0.0193125	HELB
hsa-miR-324-5p	1	626	0.159744	-1.95225	0.0045	0.0193125	NAB2
hsa-let-7d	1	662	0.151057	-2.04044	0.0045	0.0193125	NAB2
hsa-let-7g	1	663	0.15083	-2.04286	0.0045	0.0193125	HELB
hsa-miR-15a	1	737	0.135685	-2.21724	0.0045	0.0193125	NAB2
hsa-miR-337	1	361	0.277008	-1.19415	0.005	0.0209137	CAPN3
hsa-miR-491	1	374	0.26738	-1.23805	0.005	0.0209137	CAPN3
hsa-miR-141	3	614	0.488599	-0.983551	0.005	0.0209137	WDR3, CCDC62, AIFM1
hsa-miR-22	1	646	0.154799	-2.00154	0.005	0.0209137	ABL2
hsa-miR-193b	2	668	0.299401	-1.60265	0.005	0.0209137	VLDLR, GTF2H4
hsa-miR-132*	1	88	1.13636	0.31924	0.0055	0.0217885	MAD2L1
hsa-miR-146a*	1	98	1.02041	0.209609	0.0055	0.0217885	PROCA1
hsa-miR-362	1	232	0.431034	-0.682869	0.0055	0.0217885	MDN1
hsa-miR-801	1	298	0.33557	-0.964684	0.0055	0.0217885	PROCA1
hsa-miR-365	2	366	0.546448	-0.616678	0.0055	0.0217885	PRSS21, GTF2H4
hsa-miR-874	2	383	0.522193	-0.685853	0.0055	0.0217885	PRSS21, GTF2H4
hsa-miR-572	2	405	0.493827	-0.771803	0.0055	0.0217885	NAB2, GTF2H4
hsa-miR-217	2	582	0.343643	-1.36029	0.0055	0.0217885	HELB, CCDC62
hsa-miR-421	1	588	0.170068	-1.8564	0.0055	0.0217885	MAD2L1
hsa-miR-422a	2	597	0.335008	-1.40411	0.0055	0.0217885	TOM1L1, RPUSD3
hsa-miR-132	2	601	0.332779	-1.41568	0.0055	0.0217885	HELB, GTF2H4
hsa-miR-188	2	253	0.790514	-0.0705044	0.006	0.0229953	POMGNT1, MED23
hsa-miR-182	2	619	0.323102	-1.46712	0.006	0.0229953	WDR3, NAB2
hsa-miR-328	3	691	0.434153	-1.21856	0.006	0.0229953	TOM1L1, FHAD1, GTF2H4
hsa-miR-103	2	726	0.275482	-1.75564	0.006	0.0229953	CCDC62, ABL2
hsa-miR-107	2	747	0.267738	-1.80931	0.006	0.0229953	CCDC62, ABL2
hsa-miR-15b	1	764	0.13089	-2.27891	0.006	0.0229953	IFT122
hsa-miR-485-5p	2	839	0.238379	-2.03546	0.006	0.0229953	WDR3, NAB2
hsa-miR-210	2	368	0.543478	-0.62495	0.0065	0.0242353	DNAJC17, PTCH1
hsa-miR-647	2	443	0.451467	-0.912038	0.0065	0.0242353	MED23, MYO7B
hsa-miR-29c	2	505	0.39604	-1.12266	0.0065	0.0242353	TARBP2, STARD5
hsa-miR-216b	2	532	0.37594	-1.20862	0.0065	0.0242353	TRIM14, STARD5
hsa-miR-29b	2	568	0.352113	-1.31873	0.0065	0.0242353	TARBP2, STARD5
hsa-miR-637	2	697	0.286944	-1.68006	0.0065	0.0242353	DNAJC17, MED23
hsa-miR-585	2	216	0.925926	0.15846	0.007	0.0245447	MED23, NAB2
hsa-miR-558	2	295	0.677966	-0.294893	0.007	0.0245447	MED23, NAB2
hsa-miR-34c	2	368	0.543478	-0.62495	0.007	0.0245447	MED23, NAB2
hsa-miR-496	2	451	0.443459	-0.940386	0.007	0.0245447	ADAM28, INADL
hsa-miR-602	2	456	0.438596	-0.957913	0.007	0.0245447	MED23, NAB2
hsa-miR-376a	2	491	0.407332	-1.07681	0.007	0.0245447	CRYBB2P1, UGT8
hsa-miR-449a	2	514	0.389105	-1.15166	0.007	0.0245447	PRSS21, MED23
hsa-miR-376b	2	517	0.386847	-1.16125	0.007	0.0245447	CRYBB2P1, UGT8
hsa-miR-34c-5p	2	527	0.379507	-1.19294	0.007	0.0245447	PRSS21, MED23
hsa-miR-377	2	587	0.340716	-1.37498	0.007	0.0245447	MED23, ADAM9
hsa-miR-200c	2	599	0.33389	-1.4099	0.007	0.0245447	TRIM14, UGT8
hsa-miR-374b	2	703	0.284495	-1.69584	0.007	0.0245447	ADAM28, U2SURP
hsa-miR-374a	2	736	0.271739	-1.7813	0.007	0.0245447	ADAM28, U2SURP
hsa-miR-449b	2	770	0.25974	-1.86716	0.007	0.0245447	PRSS21, MED23
hsa-miR-370	3	786	0.381679	-1.48525	0.0075	0.0261864	DNAJC17, PTCH1, GTF2H4
hsa-miR-571	3	284	1.05634	0.430931	0.008	0.0269061	MED23, UBR4, RNFT1
hsa-miR-604	2	406	0.492611	-0.775622	0.008	0.0269061	PRSS21, RNFT1
hsa-miR-425	2	423	0.472813	-0.839437	0.008	0.0269061	CRYBB2P1, ADAM9
hsa-miR-565	2	491	0.407332	-1.07681	0.008	0.0269061	NAB2, RNFT1
hsa-miR-135a	3	580	0.517241	-0.872965	0.008	0.0269061	DNAJC17, CCDC62, TAF4B
hsa-miR-218	3	582	0.515464	-0.879603	0.008	0.0269061	MED23, AC091565.1, SURF2
hsa-miR-136	2	668	0.299401	-1.60265	0.008	0.0269061	ADAM28, HELB
hsa-miR-340	3	976	0.307377	-1.96541	0.008	0.0269061	TRIM14, RNFT1, GTF2H4
hsa-miR-590-3p	2	1168	0.171233	-2.76333	0.008	0.0269061	TRIM14, HELB
hsa-miR-200a	4	596	0.671141	-0.449967	0.0085	0.0282419	WDR3, CCDC62, AIFM1, RNFT1
hsa-miR-185	2	713	0.280505	-1.72197	0.0085	0.0282419	PRSS21, DNAJC17
hsa-miR-497	2	777	0.2574	-1.88459	0.0085	0.0282419	MED23, IFT122
hsa-miR-505	3	509	0.589391	-0.624999	0.009	0.029664	NBEAL1, RNFT1, GTF2H4
hsa-miR-145	2	729	0.274348	-1.76336	0.009	0.029664	ABL2, RPUSD3
hsa-miR-663	3	649	0.46225	-1.09281	0.0095	0.0311873	DNAJC17, NAB2, GTF2H4
hsa-miR-142-3p	2	401	0.498753	-0.756456	0.01	0.0326984	MED23, CCDC62
hsa-miR-431	4	569	0.702988	-0.350578	0.0105	0.0339294	PRSS21, FUT8, RNFT1, GTF2H4
hsa-miR-143	3	600	0.5	-0.93858	0.0105	0.0339294	MED23, NAB2, ABCA13
hsa-miR-608	3	684	0.438596	-1.19798	0.0105	0.0339294	DNAJC17, UBR4, NAB2
hsa-miR-638	3	507	0.591716	-0.617628	0.011	0.0354063	DNAJC17, MED23, NAB2
hsa-miR-34a	3	779	0.385109	-1.46633	0.0115	0.0368716	PRSS21, MED23, NAB2
hsa-miR-221	3	488	0.614754	-0.546389	0.012	0.0383256	MED23, ABL2, NAB2
hsa-miR-135b	4	558	0.716846	-0.308945	0.0125	0.0394636	DNAJC10, DNAJC17, CCDC62, TAF4B
hsa-miR-224	3	588	0.510204	-0.899411	0.0125	0.0394636	MDN1, MED23, HELB
hsa-miR-24	3	795	0.377358	-1.50943	0.0125	0.0394636	PRSS21, NAB2, UGT8
hsa-miR-296-3p	3	439	0.683371	-0.35138	0.013	0.0408855	DNAJC17, MRPL37, CCDC62
